# 1 **Out of Africa by spontaneous migration waves**

2  
3 Paul D. Bons<sup>1\*</sup>, Catherine C. Bauer<sup>1,2</sup>, Hervé Bocherens<sup>1,2</sup>, Tamara de Riese<sup>1</sup>, Dorothée G.  
4 Drucker<sup>1,2</sup>, Michael Francken<sup>1,2</sup>, Lumila Menéndez<sup>1,3</sup>, Alexandra Uhl<sup>4</sup>, Boudewijn P. van  
5 Milligen<sup>5</sup>, Christoph Wißing<sup>1</sup>

6  
7 <sup>1</sup> Department of Geosciences, Eberhard Karls University Tübingen, Tübingen, Germany

8  
9 <sup>2</sup> Senckenberg Centre for Human Evolution and Palaeoenvironment (HEP), Tübingen,  
10 Germany

11  
12 <sup>3</sup> Departamento de Antropología, Universidad Nacional de La Plata, La Plata, Argentina

13  
14 <sup>4</sup> Department of Anthropology, Boston University, Boston, Massachusetts, United States of  
15 America

16  
17 <sup>5</sup> National Fusion Laboratory, CIEMAT, Madrid, Spain

18  
19 \* Corresponding author

20 paul.bons@uni-tuebingen.de

21

## 22 **Abstract**

23

24 Hominin evolution is characterized by progressive regional differentiation, as well as

25 migration waves, leading to anatomically modern humans that are assumed to have

26 emerged in Africa and spread over the whole world. Why or whether Africa was the source

27 region of modern humans and what caused their spread remains subject of ongoing debate.

28 We present a spatially explicit, stochastic numerical model that includes ongoing mutations,

29 demic diffusion, assortative mating and migration waves. Diffusion and assortative mating

30 alone result in a structured population with relatively homogeneous regions bound by

31 sharp clines. The addition of migration waves results in a power-law distribution of wave

32 areas: for every large wave, many more small waves are expected to occur. This suggests

33 that one or more out-of-Africa migrations would probably have been accompanied by

34 numerous smaller migration waves across the world. The migration waves are considered

35 "spontaneous", as the current model excludes environmental or other factors. Large waves

36 preferentially emanate from the central areas of large, compact inhabited areas. During the

37 Pleistocene, Africa was the largest such area most of the time, making Africa the statistically

38 most likely origin of anatomically modern humans, without a need to invoke additional

39 environmental or ecological drivers.

40

## 41 **Introduction**

42

43 Hominins are generally supposed to have originated in Africa and settled most of Africa and  
44 the southern half of Eurasia in the early Pleistocene [1-5]. Fossil evidence suggests that  
45 earliest *Homo sapiens* appeared in Africa during the late Middle Pleistocene (Jebel Irhoud,  
46 Omo and Herto [6-8]). Anatomically modern humans (AMH) emerged, spread out of Africa  
47 during the Late Pleistocene and now occupy the whole world as the only *Homo* species [9-  
48 13]. In the intervening time, a number of *Homo* species, such as Neanderthals, Denisovans,  
49 *Homo erectus*, *H. heidelbergensis*, *H. ergaster*, etc. existed, developed and disappeared again  
50 [14-21]. Pleistocene human evolution is thus characterised by differentiation, speciation,  
51 migration waves and extinction events. Most authors assume that the out-of-Africa spread  
52 of AMH involved one or more migration waves that replaced *Homo* species that existed at  
53 the time with only limited genetic admixture, such as between Neanderthals and AMH [22-  
54 23]. Many studies have addressed the timing and origin of migration waves, as well as  
55 migration paths [e.g. 24,22,25,26,13]. Apart from the major out-of-Africa event(s), AMH  
56 populations experienced several more migration waves within already populated areas,  
57 such as Africa [27-28] and Europe [29-30]. Considering this, it is not unlikely that more  
58 migration waves occurred in the Pleistocene, but the sparse fossil record still makes it  
59 difficult to detect any.

60         Assuming that migration waves did happen, the question arises what caused them,  
61 in particular the spread of AMH. Most authors favour some competitive advantage of AMH  
62 over other *Homo* species [31-33]. With climate change now central in the scientific  
63 discourse, many recent studies suggest that climate played an important role in the  
64 environmental changes making AMH more competitive than other *Homo* species, or  
65 allowing opening ecological corridors for dispersal of *Homo sapiens* out of Africa [34-42].

66 An opposite view is that AMH and Neanderthals actually had no competitive advantage over  
67 each other [43]. The argument, based on a numerical model, is that, because AMH's  
68 population was much larger than that of Neanderthals [44-46,12], AMH's were statistically  
69 more likely to reach fixation in both Africa and Europe.

70 Although modelling is extensively used in studies of human evolution [e.g. 47-48],  
71 relatively few studies so far employed forward approaches on an explicit map to, for  
72 example, determine amounts of admixture, stepping stones or the most probably origin of  
73 AMH [49,50,38,51,52,43]. Kolodny and Feldman [43] used a simple "map" with only two  
74 demes to determine the chances that AMH would replace Neanderthals purely due to the  
75 larger population of AMH in Africa compared to Neanderthals in Europe. The SPLATCHE2  
76 simulations [52] and the similar model by Eriksson et al. [38] assumed *a priori* that AMH  
77 have some advantage and explored the advance of AMH in relation to climate factors. These  
78 various models have in common that the species (AMH) and its competitive advantage are  
79 predefined.

80 Here we present a basic numerical model to simulate the spatial and temporal  
81 differentiation/speciation and the emergence, frequency and patterns of migration waves.  
82 Contrary to the above-mentioned models, no human species are defined *a priori*. The only  
83 aim is to explore the statistics of patterns, without claiming or attempting to simulate the  
84 actual emergence and spread of AMH, which would only be one of an infinite number of  
85 realisations of the stochastic model. Although a range of environmental factors have been  
86 invoked to explain various aspects of human evolution, we expressly do not include these in  
87 the models presented here. The aim is to provide a null hypothesis against which additional  
88 environmental factors and influences can be further tested.

89

## 90 **Methods**

91

92 The model is based on a regular 2-dimensional grid of demes, each a square area with a  
93 number of individuals. The genome ( $G$ ) of a deme is defined by a single string of  $N$  binary  
94 genes, with two alleles, either zero or one (similar to e.g. [53]). This genome is the single  
95 dominant or representative genome for the population of a deme. The temporal and spatial  
96 evolution of genomes is modelled in discrete time steps of length  $\Delta t$  in which mutations  
97 take place and genes are transferred between neighbouring demes. The distribution of  
98 genomes is visualised in RGB colour maps in which each deme is one pixel. Red is  
99 proportional to the number of ones in the deme's genome, blue proportional to the number  
100 of genes identical to  $G_i=\{10101010, \text{etc.}\}$  and green proportional to the number of genes  
101 identical to  $G_i=\{00110011, \text{etc.}\}$ . Colours are stretched to maximise the colour range.

102

## 103 **Mutations**

104

105 Mutations are carried out at the start of each time step. For each mutation, a deme is first  
106 randomly picked. Next, a random gene that has allele "0" everywhere in the model is chosen.  
107 This gene will be mutated by changing its allele from "0" to "1" in the deme. This procedure  
108 is repeated  $M$  times (the mutation rate) per time step. The mutation chance ( $m$ ) per time  
109 step for one single deme is  $m=M/A$ , with  $A$  the area of the model.  $m$  is the chance that one  
110 mutation emanating from a single individual reaches fixation in the whole population (of

111 size  $N_D$ ) of a single deme in a time step of  $T$  generations.  $m$  thus depends on  $T$ ,  $N_D$  (itself the  
112 product of population density  $\rho$  and area  $S^2$  of a deme) and the intrinsic mutation rate  $m_0$  of  
113 one individual per generation. The number of mutations that occur in one deme per  
114 generation is proportional to  $N_D \cdot m$ . However, the chance that a mutation reaches fixation  
115 within the population is roughly inversely proportional to  $N_D$  for  $s \approx 0$ , with  $s$  the competitive  
116 advantage [54]. It follows that the rate of successful mutations within the deme is  
117 proportional to  $m_0$ , and is not dependent on the population size of the deme. The model,  
118 however, uses time steps  $T$  of more than one generation. It will be shown below that  $T \propto N_D$ ,  
119 and hence,  $m \propto m_0 \cdot N_D$ .

120 We use the term "active mutations" for those mutations that have not reached  
121 fixation, i.e. they occupy at least one, but not every deme in the map of all demes. Once a  
122 mutation has reached fixation by occupying every deme in the model it no longer plays an  
123 active role. The timing of fixation of a mutation is recorded, as well as the location of origin  
124 of the mutation.

125

## 126 **Allele exchange between neighbours**

127

128 A mutation step is followed by one round of interbreeding in which single alleles may be  
129 transferred between neighbouring demes (here using a Von Neumann direct  
130 neighbourhood scheme). All demes are considered on average once in a random order for  
131 transfer between a deme (deme  $a$ ) and a randomly selected direct neighbour (deme  $b$ ).  
132 Each pair is thus treated every two steps on average. The chance that a transfer between  
133 neighbouring deme is considered in one time step is defined by the parameter  $D$ . It can be

134 regarded as a general diffusion parameter: the chance, per time step, that an allele jumps  
135 from one deme to a neighbour in a random Brownian movement [55-57,54]. Assortative  
136 mating [58] is included in a way similar to the model of Barton and Riel-Salvatore [51].  
137 With assortative mating, similar individuals are more likely to mate than different ones.  
138 This is implemented with the "assortative mating factor" ( $\alpha$ ), which reduces  $D$  as a function  
139 of  $\Delta G$ , which is the number of genes that have different alleles in the two neighbouring  
140 demes under consideration:

$$141 \quad D = D_0(1 - \alpha\Delta G), \text{ with } \Delta G = \sum |G_{(a)} - G_{(b)}|. \quad (1)$$

142  $D_0$  is the reference diffusion parameter, equal to  $D$  for the case that  $\alpha=0$ . It is first decided  
143 with a random-number generator whether a gene transfer will take place or not, according  
144 to Eq. (1). If this is to happen, all genes in the list are considered for allele transfer. The  
145 chance  $P(a \rightarrow b)$  that an allele of the genome of deme  $a$  is copied to deme  $b$  is calculated  
146 with:

$$147 \quad P(a \rightarrow b) = 0.5 + p \Delta F_{a,b}, \text{ with } \Delta F_{a,b} = \sum G_{(a)} - \sum G_{(b)} \text{ and } P(b \rightarrow a) = 1 - P(a \rightarrow b). \quad (2)$$

148  $\Delta F_{a,b}$  is the difference in number of mutations (ones) between the two demes. The chance  
149 that a deme passes on its mutations to a neighbour is thus determined by the overall  
150 number of mutations relative to that neighbour ( $\Delta F_{a,b}$ ) and the advantage factor  $p$  that  
151 defines the competitive advantage of these mutations (assumed the same for all mutations).  
152 In this paper we define the sum of all genes ( $F = \sum(G)$ ) as the "fitness" of a deme. This is  
153 because the number of advantageous genes ( $F$ ), multiplied by the advantage factor ( $p$ )  
154 determines the chance that genes are passed on to offspring. When  $p=0$ , mutations are  
155 neutral and there is no preferential transfer of alleles and we have purely random

156 spreading of zeros and ones, but, on average, no change in their frequency. A positive value  
157 of  $p$  leads to fitter demes to pass on their alleles to their neighbours. Note that the transfer  
158 chance of a single allele does not only depend on its own value, but on that of the whole  
159 genome. This can potentially lead to less competitive zeros replacing more competitive  
160 ones.

161 To estimate the duration of one time step, we can consider the population of the two  
162 neighbouring demes as one during the transfer. Of interest is the case where the mutation  
163 only occurs in one of the two demes, i.e. when it is carried by 50% of the combined  
164 population. The time step  $T$  (in number of generations) is thus the time it takes for a  
165 mutation to reach fixation by genetic drift in the combined population with a chance of  
166  $0.5+p$  or extinction with a chance of  $0.5-p$ . Using a basic Monte Carlo model for populations  
167 of up to a few hundred individuals, we find for the time step  $T$  (S1 Methods Eq. S3):

$$168 \quad T \approx 7 \frac{\rho S^2}{D_0} = 7 \frac{N_D}{D_0}. \quad (3)$$

169 Here,  $S$  is the size of a deme and  $\rho$  the population density. Equation (3) only holds for  
170 weakly competitive mutations ( $s \ll 1$ ), small values of  $p$ , and no variation in population  
171 density between demes. The factor  $p$  is related to  $s$ , the competitive advantage of the  
172 mutation [59,55-57,54] (S1 Methods Eq. S2):

$$173 \quad p \approx 0.29 \cdot \rho S^2 \Leftrightarrow s \approx 3.4 \frac{p}{\rho S^2} = 3.4 \frac{p}{N_D}. \quad (4)$$

174 At a deme size of  $S=50$  km and a population density of 0.01 individuals/km<sup>2</sup>,  $T$  is about 175  
175 generations ( $\approx 4000$  years at 25 years/generation) for  $D_0=1$  as used throughout this paper.  
176 Using  $p=0.05$  results in a competitive advantage of  $s \approx 0.7\%$ .

177



## 178 Spreading of mutations

179  
180 A single mutation in a field of demes without any other mutations has a chance of  $0.5 \cdot p$  to  
181 disappear the first time an interbreeding event is considered with one of its neighbours.  
182 The initial survival rate is thus a function of  $p$ . The low initial survival rate is due to two  
183 factors. The first is a numerical effect that the width of diffusional front is less than can be  
184 resolved at the scale of the demes. The second is related to genetic drift [60-61], where the  
185 effective population (cluster of demes around the new mutation) is small and therefore the  
186 chance of survival smaller than when the mutation has spread over a large area.

187 Once a mutation has survived this initial nucleation phase by spreading over  
188 sufficient demes, the area occupied by the deme increases linearly with time. The expansion  
189 front is not sharp, but diffuse, in accordance with the diffusion-reaction model of [55]. The  
190 width of the diffusional front decreases with increasing  $p$  (Fig 1A-C) as the advantage factor  
191 becomes more important relative to the diffusional spreading. After the initial nucleation  
192 phase, the area ( $A_{mut}$ ) occupied by the single mutation increases linearly with the square of  
193 time. We define the velocity ( $v$ , in deme size per time step) of the expanding front as the  
194 rate of increase in radius ( $r_{eq}$ ) of an equivalent circle with area  $A_{mut}$ :

$$195 \quad v = \frac{dr_{eq}}{dt} = \frac{d(\sqrt{A_{mut}/\pi})}{dt}. \quad (5)$$

196 The spreading velocity ( $v_{(p)}$ ) as a function of  $p$  is determined from 2500 simulations of an  
197 expanding mutation after a stable diffusive front has been established ( $50 < r_{eq} < 150$  demes).  
198  $v_{(p)}$  is determined by the chance (proportional to  $p$ ) that the mutation is copied to a deme  
199 without that mutations and the length ( $L_{if}$ ) of the interface between demes with and

200 without that mutation.  $L_{if}$  is much larger than the circumference ( $2\pi r_{eq}$ ) of the equivalent  
201 circle in case of a diffusive front.  $L_{if}/2\pi r$  thus decreases with  $p$  and can be approximated  
202 with a power law (using a least-squares best fit, with  $r^2=0.99565$ ; Fig 1D):

$$203 \quad \frac{L_{if}}{2\pi r_{eq}} \approx 1.43 \cdot p^{-0.45}. \quad (6)$$

204 As a result,  $v_{(p)}$  is approximately a power-law function of  $p$  ( $r^2=0.9993$ ; Fig 1E):

$$205 \quad v_{(p)} = D_0 \cdot 0.83 \pm 0.02 \cdot p^{0.54} \text{ deme/step}. \quad (7)$$

206 The exponent is slightly larger than 0.5 due to the fact that the spreading front becomes less  
207 fuzzy with increasing  $p$ . This means that demes at the front have fewer neighbours without  
208 the mutation when  $p$  is large than when it is small.

209  
210 **Fig 1. Spreading rates of mutations.** Distribution of a single mutation originating from the  
211 centre of a circular model ( $R=100$  demes) at the stage where the effective radius of the area  
212 occupied by the mutation is 60 demes. **A.**  $p=0.0125$  at  $t=990$ . **B.**  $p=0.025$  at  $t=720$ . **C.**  $p=0.05$   
213 at  $t=410$ . The effect of increasing  $p$  is an increase in spreading rate and a sharpening of the  
214 spreading front. **D.** Interface length divided by effective circle circumference versus drift  
215 factor in a double-log plot. Data approximately follow a power law. **E.** As a result, spreading  
216 velocity versus advantage factor also shows a power-law relationship. **F.** Distribution of six  
217 mutations seeded at the centre of the model ( $R=100$  demes) at  $t=0$ . Colours show number of  
218 mutations on a deme from one (pink) to six (black).

219  
220 The initial spreading velocity is higher when multiple mutations are placed in the  
221 centre of the model (Fig 1F). This is expected, because  $\Delta F > 1$  in Eq. (2). However, the steady-  
222 state velocity of these mutations is the same when the diffusion front is wide enough (low

223 *p*). The explanation is that demes within this diffusive front mostly only have a low  $\Delta F$  with  
224 their direct neighbours and thus spread as fast as a single mutation. This implies that gene  
225 surfing due to high  $\Delta F$  is not effective during steady-state spreading of an ensemble of  
226 mutations. However, when two different populations, with high  $\Delta F$ , would suddenly come  
227 into contact the mutation spreading effect is expected to be high.

228

## 229 **Replacement events**

230

231 Full genome transfers or replacement events are considered after the interbreeding step.  
232 Again, all demes and one random direct neighbour are considered in a random order. A full  
233 genome replacement is carried out if the absolute fitness difference  $|\Delta F|$  is equal or greater  
234 than a set critical fitness difference  $\Delta F_{crit}$ . In that case, the full genome of the fittest deme is  
235 copied to that of its neighbour. After one round where all demes and one random neighbour  
236 are considered once for a replacement, the replacements may have led to new pairs that  
237 exceed  $\Delta F_{crit}$ . The routine is therefore repeated until  $\Delta F < \Delta F_{crit}$  everywhere in the model.  
238 When  $\Delta t$  is small, this semi-instantaneous spreading would be relatively fast (up to the  
239 order of a km/yr, depending on the size of demes). However, we use this scheme here to be  
240 able to track individual replacement "avalanches" within one time step. Contiguous areas  
241 that experienced a full genome replacement are termed "sweeps" here. The time and area of  
242 each sweep ( $A_{sw}$ ) is recorded at the end of each time step, as well as a map of all demes that  
243 experienced a genome replacement sweep.

244

## 245 **Aims**

246  
247 The aim of this paper is to illustrate the main types of evolutionary behaviour that result  
248 from different combinations of diffusive spreading with competitive advantageous  
249 mutations, assortative mating and replacement waves. It is not our intention to  
250 systematically investigate and quantify the effect of each of the parameters. We therefore  
251 only present four representative cases, using a reference model with 3 square inhabited  
252 areas, connected by narrow isthmuses. The areas or "continents" are 100x100, 50x50, and  
253 25x25 demes in size. In each individual simulation presented below we keep all parameters  
254 constant in space and time. This implies that any environmental factors that could affect the  
255 competitive advantage of individual mutations, their spreading rate, and the population  
256 density are kept constant in space and time. This serves the aim of this paper to investigate  
257 patterns that develop in the complete absence of any environmental or other external  
258 influences. We consider this as a fundamental preliminary step in order to further discuss  
259 diversification processes during human evolution.

260

## 261 **Results and discussion**

262

### 263 **Diffusion effect**

264

265 We first consider the case (Fig 2A) without genome replacements ( $\Delta F_{crit}=\infty$ ) or assortative  
266 mating ( $\alpha=0$ ). The mutation rate  $M$  is set to four mutations per time step and  $p$  is 0.05.  
267 Individual mutations spread leading to increasing variation in genomes within the model.

268 This is comparable to the geographic differentiation through isolation-by-distance as  
269 proposed for the reticulate or multiregional evolution model [62-63] or the recent  
270 assimilation model [64-65]. Demes in the centre of the model are on average nearer to the  
271 origins of mutations than are demes on the periphery. Fitness therefore increases faster in  
272 the centre than the periphery, as can be seen in the fitness profile across the three  
273 "continents" (Fig 2A). After steady outward fitness gradients are established at about  $t=250$ ,  
274 genetic signatures migrate outwards, down the gradients. Signatures in the periphery are  
275 thus regularly overprinted by those coming from the centre.

276  
277 **Fig 2. Time evolution over 1000 steps of genome signatures along a profile x-y**  
278 **through the three continents.** Map view of genetic variations is shown at stages 500 and  
279 1000. Colours qualitatively represent variations in genome, with the red tones proportional  
280 to "fitness". Graphs show the fitness profiles for four time steps. **A.** In case of diffusion only,  
281 genetic signatures tend to emanate from the centre of the occupied areas and spread out  
282 towards the margins. **B.** When assortative mating is added, internally relative homogeneous  
283 "nation" regions with sharp boundaries develop from about  $t=500$  steps. As these  
284 boundaries inhibit spreading of mutations, overall fitness increases more slowly than  
285 without assortative mating.

286

## 287 **The effect of assortative mating**

288

289 The effect of the assortative mating factor ( $\alpha$ ) is to reduce the rate of gene exchange when  
290 the genomes of neighbouring demes are different. Figure 2B shows the effect of assortative

291 mating in the same model as Fig 2A, but with  $\alpha$  set to 0.05. This means decreasing genetic  
292 exchange up to  $\Delta G=20$ , where exchange is reduced to zero. With initially low variations in  
293 genetic signature, the effect in the beginning is only to slow down differentiation. At about  
294  $t=500$ , first neighbouring demes cease exchanging alleles, which allows their  $\Delta G$  to increase  
295 further. This finally leads to homogeneous regions, bounded by fixed, sharp borders. In Fig.  
296 2B these are visible as persistent, sharp changes in colour. New mutations cannot escape  
297 these "nations". Because the fixation time within a "nation" is smaller than for the whole  
298 model, these mutations can now spread significantly before more mutations occur, thus  
299 keeping  $\Delta G$  and  $\Delta F$  low within a "nation", while  $F$  for each "nation" keeps rising steadily. A  
300 large area, high mutation rate and low spreading rate (low  $D_0$  and  $p$ ) all favour high values  
301 of both  $\Delta F$  and  $\Delta G$  (with  $\Delta G \geq \Delta F$ ). When these values remain too low, incipient borders shift  
302 and weaken again, which inhibits the establishment of permanent borders. This effect is  
303 visible in the medium and small "continents" that now behave as a closed system with  
304 highest fitness in the centre, but no internal "nation" borders. The development of "nations"  
305 or a structured population [66] results in a breakdown of the positive relationship (Fig 2A)  
306 between genetic signature and distance between points or isolation by distance [67]. This  
307 leads to a relative isolation of demes, which is strengthened through time.

308

### 309 **Effect of replacement sweeps**

310

311 The effect of replacement is again illustrated with the three-continent model (Fig 3), using  
312 the same  $p=0.05$  and  $M$  of four mutations per time step as before.  $\Delta F_{crit}$  is set at 10, so the

313 genome of a deme is fully replaced by that of its neighbour if that neighbour has at least 10  
314 mutations more.

315  
316 **Fig 3. Evolution of genetic signatures in case of replacement sweeps in the absence of**  
317 **assortative mating. A.** Temporal evolution along the line x-y through the centre of the  
318 model. Sharp changes in colour indicate replacement sweeps. The main ones are  
319 highlighted in yellow. Graph shows the area (relative to total area) of individual sweeps as a  
320 function of time. Replacement sweeps are strongly clustered in time. Map views show the  
321 genetic distribution at selected points in time. Direction and extent of selected sweeps are  
322 shown by yellow arrows and white lines that trace the front at regular intervals,  
323 respectively. Doubling (**B**) or halving (**C**) the deme size roughly doubles or halves,  
324 respectively, the average time interval between clusters of replacement sweeps, but not the  
325 general pattern.

326  
327 In the absence of assortative mating ( $\alpha=0$ ), fitness increases steadily, especially in  
328 the centre of the model, until gradients exceeding  $\Delta F_{crit}$  are reached (at  $t=274$  in Fig 3A).  
329 This typically happens somewhere between the centre and the margin. This is because,  
330 although fitness is highest in the centre, gradients are generally low here. Gradients are  
331 highest near the margins, where fitness is lower than in the centre. As a result,  
332 replacements first sweep the margins of the model ( $t=274$ ), skirting the high-fitness centre  
333 (for example at  $t=296$ ). Demes in the swept area with a single genome subsequently  
334 exchange alleles with the unswept demes, which rapidly leads to genomes with enhanced  
335 fitness again, and, hence, new sweeps ( $t=299$ ). A rapid succession of admixture and

336 replacement sweeps leads to homogenisation of the genome over the whole area. Although  
337 the new global genome is closest to that of the centre of the model, there are significant  
338 changes by admixture during the various successive sweeps.

339         After homogenisation of the genome, it takes some time for gradients to develop  
340 again to initiate a new cycle of replacement sweeps. This leads to a regular cycle of 200-300  
341 time steps of differentiation without any sweeps, followed by a rapid succession of many  
342 small and a few large sweeps that sweep almost the whole model area (Fig. 3A). This  
343 pattern is in line with the punctuated-equilibrium model [68-70]. Reducing the resolution  
344 by a factor two, while keeping all other parameters the same, implies reducing the  
345 population density and the frequency of mutations in the model by a factor four. Gradients  
346 now increase at a lower rate and the duration of a full cycle is roughly doubled (Fig 3B).  
347 Doubling the resolution has the opposite effect and leads to a reduction of the cycle time  
348 (Fig 3C). Independent of resolution, admixture results in several large sweeps that together  
349 reset the genomes in the whole area.

350         Adding assortative mating ( $\alpha=0.05$ ) to the previous simulation significantly changes  
351 the evolution of the model (Fig 4A). After the initial differentiation period, first sweeps  
352 occur and, again, mostly sweep the margins. Contrary to the previous case where  $\alpha=0$ , the  
353 sweeping genome is now unlikely to interbreed with fit demes at the edge of the swept area  
354 owing to their large  $\Delta G$ . New sweeps are thus not immediately triggered for lack of  
355 admixture, and sweeps are less clustered in time. Demes in the centre are rarely or even  
356 never swept, providing a genetic continuity here. These demes have a higher fitness than  
357 the surrounding homogenised swept areas, and thus have a higher chance to initiate future  
358 sweeps. Marginal areas show distinct extinction events, as can be seen by distinct colour



359 changes in Fig. 4B. Halving or doubling the resolution has the expected effect of increasing,  
360 respectively decreasing the time between sweeps (Fig 4B-C).

361  
362 **Fig 4. Evolution of genetic signatures in case of replacement sweeps as in Fig 3, but**  
363 **now with additional assortative mating. A.** Temporal evolution along the line x-y  
364 through the centre of the model. Sharp changes in colour indicate replacement sweeps. The  
365 main ones are highlighted in yellow. Note the overall continuity in time of genomes in the  
366 centre of the large continent that is rarely swept by migration waves. Graph shows the area  
367 (relative to total area) of individual sweeps as a function of time. Replacement sweeps are  
368 less clustered in time than in case of no assortative mating. Map views show the genetic  
369 distribution at selected points in time. Direction and extent of selected sweeps are shown  
370 by yellow arrows and white lines that trace the front at regular intervals, respectively.  
371 Doubling (B) or halving (C) the deme size roughly doubles or halves, respectively, the  
372 average time interval between clusters of replacement sweeps, but not the general pattern.

373  
374 Figures 3 and 4 show that marginal areas, in particular the small continent  
375 experience more sweeps than the centre of the area inside the large continent. The  
376 simulations shown in Figs 3A and 4A were also run for 10,000 steps, recording each time a  
377 deme was swept. Figure 5A shows that the chance for the two smaller continents and the  
378 margins of the large continent to be swept is about 1.5 times higher than in for the centre of  
379 the large continent in the absence of assortative mating. In case of assortative mating, the  
380 effect is even stronger. Demes in the centre of the largest continent thus have a much higher  
381 chance to be preserved, as these demes are rarely swept. This also affects the survival

382 chance of mutations. The origins of mutations that reached fixation are plotted in Fig. 5B.  
383 We see that these are strongly concentrated in the centre of the large continent. While this  
384 continent occupies 76% of the whole model area, it is the origin of >99% of all mutations  
385 that reached fixation. The medium continent with 19% of the area delivered only <1% of all  
386 mutations that reached fixation and the small continent not a single one. The chance of a  
387 mutation from the medium continent to reach fixation is only 3.5% that of a mutation in the  
388 large continent in the simulation without assortative mating. In the simulation with  
389 assortative mating this change reduced to 1.7%. Replacement sweeps thus strongly favour  
390 the survival of mutations from the centre of the largest populated landmass.

391 Directions of sweeps without (settings of Fig 3A) and with assortative mating  
392 (settings of Fig 4A) were recorded for simulations running 10,000 steps. Mean sweep  
393 propagation directions can be determined from this, and in turn, mean migration paths (Fig  
394 5C). Migration paths consistently emanate from the centre of the large continent and lead to  
395 its margin and to the smaller continents. Migration directions are more consistent in case of  
396 assortative mating, resulting in a more consistent pattern of paths in the centre of the large  
397 continent.

398  
399 **Fig 5. Origin of fixed mutations, as well as distribution and directions of sweeps. A.**

400 Origin of mutations that reached fixation shown at black dots on the map. Mutations that  
401 form in the middle of the large continent have a much larger chance of reaching fixation in  
402 the whole model area than mutations deriving from the margins, especially the small  
403 continent. **B.** Relative frequency that a deme is swept by a migration wave. Demes on the  
404 margins and small continents are swept more often than demes in the centre of the large

405 continent. These patterns are more pronounced in case of assortative mating (below)  
406 relative to the run without assortative mating. **C.** Average directions of migrations within  
407 sweeps. Setting as in figures 3A (top) and 4A (bottom), run for 10,000 steps. C:

408

### 409 **Fixation rate variation**

410

411 After an initial period in which the system settles to a dynamic equilibrium, the number  
412 ( $N_{fix}$ ) of mutations that reach fixation (i.e. spreading over entire model area) increases  
413 linearly with time (Fig 6). In the absence of replacement sweeps,  $N_{fix}$  increases steadily,  
414 whereas the  $N_{fix}$ -time curve is stairway-like with replacement sweeps. This is because large  
415 replacement sweeps spread some mutations over large areas, resulting in a sudden, but  
416 temporary increase in fixation events. As the fitness landscape is flattened after these  
417 events, few mutations can subsequently reach fixation until the process is repeated again.

418

419 **Fig 6. Number ( $N_{fix}$ ) of mutations that reached fixation as a function of time with**  
420 **linear regression lines (for  $t > 600$  steps).** Main graph shows the first 1000 time steps,  
421 while the inset shows graphs for the full 5000 time steps on which the linear regressions  
422 are based. Intersection of the linear regressions is the mean time to fixation ( $t_{fix}$ ), while the  
423 slope is the rate at which mutations reach fixation. Replacement sweeps reduce the fixation  
424 chance of mutations by 60-70%, but also their  $t_{fix}$  by 3-5 times.

425

426 The time-averaged fixation chance ( $P_{fix}$ ) of an individual mutation is derived from  
427 the slope of the  $N_{fix}$ -time curve.  $P_{fix}$  is significantly lowered by replacement sweeps. With

428 interbreeding only, advantageous mutations are usually added to neighbouring genomes  
429 and few are lost by genetic drift before fixation, except at the nucleation phase just after the  
430 mutation occurred. Mutations in demes that are swept by replacement sweeps are lost, thus  
431 reducing the number of mutations that reach fixation [71]. Each wave causes a founder  
432 event, where only the limited genetic sample suddenly spreads over a large area [71-73].  
433 The effect is more pronounced in case of assortative mating. The intersection of the linear  
434 regression of the  $N_{fix}$ -time curve with the horizontal time axis (Fig 6) gives the mean time to  
435 fixation ( $t_{fix}$ ) for mutations that reach fixation.  $t_{fix}$  is about 4 times smaller in case of  
436 replacement sweeps than without these. This is to be expected, as replacement sweeps  
437 provide an efficient means to spread mutations over the map.

438         The reduced  $t_{fix}$  resulting from replacement sweeps has the advantage that a species  
439 can more quickly adapt to changes in the environment. This would cause some mutations to  
440 loose, and other to gain competitiveness. The latter can spread quickly in case of  
441 replacement sweeps. However, an inclination of a species towards replacements (low  $\Delta F_{crit}$ )  
442 comes at a cost. Replacement sweeps imply that part of the population is excluded and  
443 inhibited from further contributing to the species through their offspring. Furthermore, our  
444 simulations that are intentionally without any environmental changes show that a low  $\Delta F_{crit}$   
445 also leads to spontaneous replacement sweeps in the complete absence of any external  
446 factors.

447

## 448 **Sweep area statistics**

449

450 Although the largest sweeps are the most conspicuous in Figs 3 and 4, these are  
451 accompanied by many more smaller sweeps. Figure 7 shows the frequency ( $f$ ) of sweep  
452 areas versus their normalised area ( $A_n = \text{sweep area}/\text{model area}$ ). We see that that the data  
453 plot on a straight line in the double-log plot, indicating a power-law relationship between  $f$   
454 and  $A_n$ , with an exponent  $-q$ :

$$455 \quad f \propto (A_n)^{-q}, \quad (8)$$

456 at least when  $A_n$  is small (up to a few per cent of the total area). A power law (Eq. 8) was  
457 fitted to the data for  $A_n < 0.01$  from simulations shown in Figs. 3 and 4, but run for up to  
458 10,000 steps, resulting in  $q$ -values ranging from 1.81 to 2.09. Frequencies were normalised  
459 such that the power-law best fit frequency for  $A_n=1$  is unity in each of the six simulations.  
460 All these normalised data together overlap remarkably well (Fig 7). We obtain  $q=1.84$  when  
461 applying a best fit to all data with  $A_n < 0.01$ . Normalised sweep areas  $> 0.02$  are  
462 overrepresented, with their frequencies up to  $> 10x$  higher than the power-law trend.  
463 Notwithstanding this, small sweeps are orders of magnitude more common than the largest  
464 ones.

465  
466 **Fig 7. Normalised frequency distribution of areas swept by migration waves plotted**  
467 **against these areas (divided by total area) in a double-log plot.** Data follow a power-  
468 law, except for the very largest sweeps. Dots represent the simulations with the schematic  
469 3-continent map shown in figs. 3 and 4, but with 10,000 time steps.

470  
471 The observed power-law relation is a hallmark of the self-organised criticality (SOC)  
472 model of Bak et al. [74] that has been used [75, 70] to explain punctuated equilibria [69].

473 The classical SOC model is the (numerical) sand pile in which grains are randomly sprinkled  
474 on a stage. Once critical heights of grain piles, or gradients in these heights are reached,  
475 grains are redistributed locally. One redistribution event can lead to neighbouring sites  
476 reaching the criterion for redistribution, sometimes leading to large "avalanches". Sizes of  
477 these avalanches typically follow power-law distributions, as the critical state has no  
478 intrinsic time or length scale [74]. The current model is similar to the classical sand-pile  
479 model, as mutations are "sprinkled" on the map of demes. There is a criterion for  
480 redistribution ( $\Delta F_{\text{crit}}$ ), which leads to replacement sweeps that indeed follow a power-law  
481 frequency distribution (Fig. 8). A first difference with the standard sand-pile model is that,  
482 contrarily to grains, mutations can multiply. The second is that the model includes diffusion  
483 as an additional transport mechanism for mutations. Models with two transport channels,  
484 one fast avalanche-like and one diffusional, have been applied to fluid flow through pores  
485 and fractures [76, 77], earthquake evolution [78, 79], and heat transport in plasmas [80].  
486 These models show that such systems still exhibit SOC-characteristics, as long as the  
487 criterion for the fast transport is frequently reached. However, with increasing importance  
488 of diffusion, avalanches become more regularly spaced in time and larger, isolated events  
489 (so-called "dragon kings" [81, 82]) become more common [80]. This behaviour is indeed  
490 observed in our "mutation-pile" model, where large sweeps are over-represented  
491 compared to small ones and there is strong ( $\alpha=0$ ) and weak ( $\alpha=0.05$ ) cyclical behaviour  
492 with periods of semi-stasis (gradual diffusional differentiation), alternating with short  
493 periods of replacement sweeps. As such the model shows punctuated-equilibrium  
494 behaviour.

495

## 496 **Application to a world map**

497

498 Having assessed the effects of, and patterns resulting from the different parameters on a  
499 schematic map with three continents, we now briefly illustrate the potential implication for  
500 human evolution. For this purpose we used a Fuller-projection map of the Old World (Fig 8),  
501 roughly adapted to ice age conditions by linking Japan and the British Isles to the mainland  
502 and assuming that large parts of northern Europe and Asia are (effectively) not inhabited.  
503 Although population densities ( $\rho$ ) would never have been equal throughout the inhabited  
504 area, we maintain the assumption of a constant  $\rho$ , but excluded high-elevation areas  
505 (especially Tibet and the Pamirs) and desert areas in North Africa and the Arabian  
506 Peninsula, adapted from Eriksson et al. [38] for  $\sim 21$  ka BP. In this configuration inhabited  
507 areas in Africa occupy 44% of the whole inhabited area. Inhabited areas evidently varied  
508 over time, but this simplified model serves the purpose of predicting the main expected  
509 patterns. Deme size was set at 50x50 km, resulting in 20808 populated demes, and settings  
510 were equal to those for the simulations shown in figures 3A and 4A. At a time step of about  
511 4000 years (for  $\rho=0.01$  individuals/km<sup>2</sup>),  $p=0.05$  would lead to a mutation spreading rate of  
512 0.002 km/yr (Eq. 5). Replacement sweeps in the current model take place within one time  
513 step. The maximum distance to travel, from South Africa to Japan is about 17,500 km,  
514 resulting in a maximum sweep velocity of  $\sim 4$  km/yr. Such high velocities, however, only  
515 apply to the few very largest sweeps.

516

517 **Fig 8. Example of applying the model for 10,000 steps with settings as in figures 3A**  
518 **and 4A to a map of the Old World.** Top row without ( $\alpha=0$ ) and bottom row with

519 assortative mating ( $\alpha=0.05$ ). **A.** Mean fitness of demes over the whole simulation, showing  
520 that demes in Central Africa are, on average, fitter than the minimum at the margins of the  
521 populated area. **B.** Origin of all mutations that reached fixation. Most ( $\alpha=0$ ) or all ( $\alpha=0.05$ )  
522 these mutations originated in Africa. **C.** Number of times that a deme has been swept by a  
523 migration wave. Demes in Central Africa experienced significantly fewer sweeps than the  
524 rest of the world, especially in case of  $\alpha=0.05$ . **D.** Mean migration paths, all emanating from  
525 central Africa and diverging towards the periphery of the continent and into Asia.

526  
527 In both simulations, with and without assortative mating, mean fitness is highest in central  
528 Africa (Fig 8A). The fitness maximum is most distinct in case of  $\alpha=0$ , because the long and  
529 regular interval between clusters of sweep events allow large-scale gradients to develop.  
530 Mutations that reach fixation mostly come from central Africa (Fig 8B). When  $\alpha=0.05$  no  
531 mutations that originated outside of Africa reach fixation. When  $\alpha=0$ , a few mutations from  
532 Asia reach fixation, because sweeps from Africa can trigger "counter" sweeps after  
533 admixture with genomes from the margin of the swept areas. The chance that a deme in  
534 central Africa is swept by a migration event is higher in case of  $\alpha=0$  than when  $\alpha=0.05$  (Fig  
535 8C). Despite these differences, migration directions are mostly emanating from central  
536 Africa in the direction of the margins of the occupied area (Fig 8D).

537 Sweep area frequencies follow the same power-law distribution (Eq. 8, Fig 9A) as in  
538 the abstract 3-continent model. Largest sweeps are again over-represented relative to the  
539 power-law trend for smaller sweeps. The effect becomes noticeable for sweeps that are  
540 larger than a few per cent of the total area. This is about 1/3 the area of Europe. The  
541 frequency distributions show two distinct peaks. One is at the area of Japan, which in the



542 model forms a narrow peninsula connected to Asia. Sweeps apparently initiate at the  
543 connection with the peninsula (where mutations rarely occur) and then tend to sweep the  
544 whole peninsula. The second peak is at about 56% of the total area, which equals the area of  
545 Eurasia. This indicates that isthmuses, such as the Sinai Peninsula, play an important role  
546 and sweeps from Africa that entered Asia have an increased chance of then sweeping the  
547 whole of Eurasia.

548  
549 **Fig 9. Sweep statistics of simulations for the Old World.** **A.** Graph of normalised  
550 frequency as a function of sweep area. **B.** Cumulative graph of number of sweeps against  
551 sweep area. About 1% of all sweeps are the size of Eurasia (56% of total area) or larger. **C.**  
552 Cumulative graph of the areas swept as a function of sweep area. About 50% of all  
553 individual deme replacements result from sweeps are the size of Eurasia (56% of total  
554 area) or larger.

555  
556 The cumulative number of sweeps as a function of area (Fig 9B) shows that sweeps  
557 of the size of Eurasia or larger represent about 1% of all sweeps. However, these few  
558 sweeps are responsible for about 50% of all individual deme replacement events over time  
559 (Fig 9C). If in the past there were one or two major out-of-Africa sweeps, one can deduce  
560 that there were in the order of 100-200 replacement sweeps in total. The average number  
561 of sweeps that an individual population in one single deme would have experienced would  
562 be about 2-4, double the number of very large sweeps. Two to four replacement events in a  
563 million years, i.e. ~40,000 generations, means that individuals in a deme have a chance in  
564 the order of 0.005-0.01% of experiencing a replacement sweep in their lifetime. Although

565 sweeps thus rarely affect individuals, they have a profound effect on the evolution of the  
566 human genome, because about half these locally experienced sweeps are part global-scale  
567 sweeps that span a significant part of the whole populated Old World.

568

## 569 **Conclusions**

570 Diffusional gene flow alone leads to a homogenisation of all populations [83]. However,  
571 ongoing mutations continuously produce local variations that take time to spread over the  
572 whole populated area. The combination of diffusion and mutations thus results in isolation  
573 by distance [67], with differences between local populations increasing with distance (Fig.  
574 2A). The magnitude of these differences or clines depends on the balance between diffusion  
575 and mutation rate. The effect of assortative mating is to create a structured population [66]  
576 with relatively homogeneous "nation" regions, separated by distinct clines. While Scerri et  
577 al.[66] argue that the structuring is due to environmental and ecological drivers, our model  
578 (Fig 2B) shows that structuring can develop due to assortative mating without any such  
579 additional drivers. Without other evolutionary mechanisms, assortative mating reduces or  
580 inhibits exchange between regions and this exchange is restricted to neighbouring regions.  
581 Migration events are an efficient way to bring populations from far-removed regions into  
582 contact. Ensuing exchange across such new contacts leads to reticulate phylogenies [63].

583 Our model shows that, if population/species replacements do occur, replacement  
584 sweeps of all sizes up to the whole populated area are expected. The basic reason is that if  
585 one group of individuals can take over the area of their neighbours, the chance that they (or  
586 their offspring) can also take over the next area is larger than zero. This can, but must not,  
587 lead to "avalanches" of replacements that can span up to the whole populated area.

588 Replacement-sweep-area frequencies systematically decrease as a power-law function of  
589 their area. For every world-spanning sweep, about two orders of magnitude smaller sweeps  
590 are to be expected, down to the size of one deme in the model. As expected, isthmuses  
591 appear to play a special "bottle neck" role during expansions. Once a sweep crosses an  
592 isthmus, there is an increased chance that the whole peninsula beyond is swept in its  
593 entirety. In simulations this leads to a distinct peak in the chance that the whole of Eurasia  
594 is swept in at an out-of-Africa event.

595 Replacement sweeps reduce the chance of fixation of mutations, but also  
596 significantly reduce the time to fixation of those mutations that do finally reach fixation. The  
597 propensity of a population to usurp the area of its neighbours if these are, for some reason,  
598 less competitive, has the benefit that advantageous mutations can quickly spread, for  
599 example after a change in environmental conditions. However, our simulations show that  
600 this propensity inevitably also leads to spontaneous replacement sweeps that are not  
601 triggered by any external factors but driven by genetic drift.

602 Our simulations show that replacement sweeps mostly emanate from the largest  
603 consolidated populated area. In the Old World this is Africa, especially during glaciation  
604 stages. The simulations indicate that the most likely origin for modern humans lies  
605 somewhere in (central) Africa, in line with what is deduced from the fossil record (e.g. [84]).  
606 However, East Asia also forms large and compact populated area, especially during warm  
607 periods, that would have been a second probable source for replacement sweeps. This  
608 emphasizes the need for further palaeoanthropological research in East Asia (e.g. [85, 5]).

609 Large migration sweeps generally emanate from the central regions of large compact  
610 areas and spread towards the margins. The spreading directions are mostly determined by

611 coastlines, mountains and other uninhabited areas. This leads to a remarkable consistency  
612 of the directions, quite independent of the parameter settings (Fig 8C). The tendency to  
613 migrate towards coasts is consistent with the beachcomber model [86]. The spreading of a  
614 migration wave is more like that of an inkblot than along narrow, bifurcating migration  
615 paths that some authors envisage [87].

616         Mutations that arise in the centre of large compact areas have the highest change to  
617 survive and spread. This is not only because these areas are the probably sources of  
618 migration sweeps, but they are also the least likely to be swept themselves (Fig 8C). This  
619 pattern illustrates the relevance of the central areas as potential sources of new variants,  
620 but also in preserving old traits.

621         Considering a combination of semi-stasis periods alternating with replacement  
622 sweeps as a result of large-scale and many smaller expansions may contribute to  
623 understand the current biological distribution of human populations, as well as the  
624 variation in the hominin fossil record. For this reason we suggest an integration of concepts  
625 coming from punctuated equilibrium theory [68,70,75], multiregional postulates [24, 62, 63,  
626 66], and current out-of-Africa migration models. Any migration wave that spanned the  
627 whole world is most likely to have come from Africa. If large migration waves can occur,  
628 more numerous smaller waves are to be expected too. Multiple out-of-Africa waves are,  
629 therefore, most likely if one happened. Although the propensity for replacement waves  
630 makes a species more adaptable to changes in its environment, a "side effect" is that such  
631 waves then also occur spontaneously. A spontaneous emergence and spread of modern  
632 humans from Africa should thus be regarded as a null hypothesis against which any  
633 hypothetical causes should be tested.

634

## 635 **References**

- 636 1. Tattersall I. Paleoanthropology: the last half-century. *Evol Anthropol.* 2000; 9: 2–16.
- 637 2. Foley R. In the shadow of the modern synthesis? Alternative perspectives on the last  
638 fifty years of paleoanthropology. *Evol Anthropol.* 2001; 10: 5–14.
- 639 3. Bräuer G. The origin of modern anatomy: by speciation or intraspecific evolution?  
640 *Evol Anthropol.* 2008; 17: 22–37.
- 641 4. Dennell RW. The colonization of “Savannahstan”: issues of timing(s) and patterns of  
642 dispersal across Asia in the Late Pliocene and Early Pleistocene. In: *Asian*  
643 *Paleoanthropology.* Springer, Dordrecht; 2011. 7-30.
- 644 5. Zhu Z, Dennell R, Huang W, Wu Y, Qiu S, Yang S, et al. Hominin occupation of the  
645 Chinese Loess Plateau since about 2.1 million years ago. *Nature.* 2018; doi:  
646 10.1038/s41586-018-0299-4.
- 647 6. White TD, Asfaw B, DeGusta D, Gilbert H, Richards GD, Suwa G, et al. Pleistocene *Homo*  
648 *sapiens* from Middle Awash, Ethiopia. *Nature.* 2003; 423: 742–747.
- 649 7. McDougall I, Brown FH, Fleagle JG. Stratigraphic placement and age of modern  
650 humans from Kibish, Ethiopia. *Nature.* 2005; 433: 733–736.
- 651 8. Hublin, JJ, Ben-Ncer A, Bailey SE, Freidline SE, Neubauer S, Skinner MM, et al. New  
652 fossils from Jebel Irhoud, Morocco and the pan-African origin of *Homo sapiens.* *Nature.*  
653 2017; 546: 289-292. doi: 10.1038/nature22336.
- 654 9. Lahr MM, Foley R. Multiple dispersals and modern human origins. *Evol Anthropol.*  
655 1994; 3: 48–60.

- 656 10. Conard NJ, Bolus M. Radiocarbon dating the appearance of modern humans and  
657 timing of cultural innovations in Europe: new results and new challenges. *J Hum Evol.*  
658 2003; 44: 331-371.
- 659 11. Hershkovitz I, Weber GW, Quam R, Duval M, Grün R, Kinsley L, et al. The earliest  
660 modern humans outside Africa. *Science.* 2018; 359: 456-459.
- 661 12. Mellars P, French, CJ. Tenfold Population Increase in Western Europe at the  
662 Neandertal-to-Modern Human Transition. *Science.* 2011; 333: 623-627.
- 663 13. Groucutt HS, Petraglia MD, Bailey G, Scerri EM, Parton A, Clark - Balzan L, et al.  
664 Rethinking the dispersal of Homo sapiens out of Africa. *Evol Anthropol: Issues, News,*  
665 *and Reviews.* 2015; 24(4): 149-164.
- 666 14. Krings M, Stone A, Schmitz RW, Krainitzki H, Stoneking M, Pääbo S. Neanderthal DNA  
667 sequences and the origin of modern humans. *Cell.* 1997; 90(1): 19-30.
- 668 15. Krings M, Geisert H, Schmitz RW, Krainitzki H, Pääbo S. DNA sequence of the  
669 mitochondrial hypervariable region II from the Neanderthal type specimen. *Proc Natl*  
670 *Acad Sci U S A.* 1999; 96: 5581-5585.
- 671 16. Krings M, Capelli C, Tschentscher F, Geisert H, Meyer S, Haeseler A. A view of  
672 Neanderthal genetic diversity. *Nat Genet.* 2000; 26: 144-146.
- 673 17. Brown P, Sutikna T, Morwood MJ, Soejono RP, Jatmiko E, Wayhu Saptomo E., et al. A  
674 new small-bodied hominin from the Late Pleistocene of Flores, Indonesia. *Nature.*  
675 2004; 431: 1055-1061.
- 676 18. Morwood MJ, Soejono RP, Roberts RG, Sutikna T, Turney CSM, Westaway KE, et al.  
677 Archaeology and age of a new hominin from Flores in eastern Indonesia. *Nature.*  
678 2004; 431: 1087-1091.

- 679 19. Morwood MJ, Brown P, Sutikna T, Saptomo EW, Westaway KE, Due RA, et al. Further  
680 evidence for small-bodied hominins from the Late Pleistocene of Flores, Indonesia.  
681 Nature. 2005; 437: 1012–1017.
- 682 20. Krause J, Orlando L, Serre D, Viola B, Prüfer K, Richards MP, et al. Neanderthals in  
683 central Asia and Siberia. Nature. 2007; 449: 902-904.
- 684 21. Krause J, Fu Q, Good JM, Viola B, Shunkov MV, Derevianko AP, et al. The complete  
685 mitochondrial DNA genome of an unknown hominin from southern Siberia. Nature.  
686 2010; 464: 894-897.
- 687 22. Higham T, Douka K, Wood R, Ramsey CB, Brock F, Basell L, et al. The timing and  
688 spatiotemporal patterning of Neanderthal disappearance. Nature. 2014; 512: 306-309.  
689 Doi: doi:10.1038/nature13621.
- 690 23. Posth C, Wißing C, Kitagawa K, Paganì L, van Holstein L, Racimo F, et al. Deeply  
691 divergent archaic mitochondrial genome provides lower time boundary for African  
692 gene flow into Neanderthals. Nat Commun. 2017; 8: 16046.
- 693 24. Cavalli-Sforza LL, Menozzi P, Piazza A. Demic expansions and human evolution. Science.  
694 1993; 259: 639-646.
- 695 25. Hublin JJ. The modern human colonization of western Eurasia: when and where? Quat  
696 Sci Rev. 2015; 118: 194-210.
- 697 26. Nigst PR, Haesaerts P, Damblon F, Frank-Fellner C, Mallol C, Viola B, et al. Early  
698 modern human settlement of Europe north of the Alps occurred 43,500 years ago in a  
699 cold steppe-type environment. PloS ONE. 2014; 111: 14394-14399.
- 700 27. Reed FA, Tishkoff SA. African human diversity, origins and migrations. Curr Opin  
701 Genet Dev. 2006; 16: 597–605.

- 702 28. Skoglund P, Thompson JC, Prendergast, ME. Reconstructing Prehistoric African  
703 Population Structure. *Cell*. 2017; 171: 59–71.
- 704 29. Fu Q, Posth C, Hajdinjak M, Petr M, Mallick S, Fernandes D, et al. The genetic history of  
705 Ice Age Europe. *Nature*. 2016; 534: 200-205.
- 706 30. Posth C, Renaud G, Mittnik A, Drucker DG, Rougier H, Cupillard C, et al. Pleistocene  
707 Mitochondrial Genomes Suggest a Single Major Dispersal of Non-Africans and a Late  
708 Glacial Population Turnover in Europe. *Curr Biol*. 2016; 26: 827-833.
- 709 31. Banks WE, d'Errico F, Peterson AT, Kageyama M, Sima A, Sanchez-Goni MF.  
710 Neanderthal extinction by competitive exclusion. *PloS ONE*. 2008; 3(12): e3972.
- 711 32. Agustí J, Rubio-Campillo X. Were Neanderthals responsible for their own extinction?  
712 *Quat Int*. 2017; 431: 232-237.
- 713 33. Gilpin W, Feldman MW, Aoki K. An ecocultural model predicts Neanderthal extinction  
714 through competition with modern humans. *Proc Natl Acad Sci U S A*. 2016; 113(8):  
715 2134-2139.
- 716 34. d'Errico F, Sánchez Goñi MF. Neandertal extinction and the millennial scale climatic  
717 variability of OIS 3. *Quat Sci Rev*. 2003; 22: 769-788.
- 718 35. Tzedakis PC, Hughen KA, Cacho I, Harvati K. Placing late Neanderthals in a climatic  
719 context. *Nature*. 2007; 449: 206-208.
- 720 36. Müller UC, Pross J, Tzedakis PC, Gamble C, Kotthoff U, Schmiedl G, et al. The role of  
721 climate in the spread of modern humans into Europe. *Quat Sci Rev*. 2011; 30: 273-279.
- 722 37. Rosenberg TM, Preusser F, Fleitmann D, Schwalb A, Penkman K, Schmid TW, Al-Shanti  
723 MA, Kadi K, Matter A. Humid periods in southern Arabia: Windows of opportunity for  
724 modern human dispersal. *Geology*. 2011; 39: 1115-1118.



- 725 38. Eriksson A, Betti L, Friend AD, Lycett SJ, Singarayer JS, von Cramon-Taubadel N,  
726 Valdes PJ, Balloux F, Manica A. Late Pleistocene climate change and the global  
727 expansion of anatomically modern humans. *Proc Natl Acad Sci U S A*. 2012; 109:  
728 16089–16094.
- 729 39. Grove M, Lamb H, Roberts H, Davies S, Marshall M, Bates R, et al. Climatic variability,  
730 plasticity, and dispersal: A case study from Lake Tana, Ethiopia. *J Hum Evol*. 2015; 87:  
731 32-47.
- 732 40. Maslin MA, Shultz S, Trauth MH. A synthesis of the theories and concepts of early  
733 human evolution. *Phil Trans R Soc B*. 2015; 370: 20140064.  
734 <http://dx.doi.org/10.1098/rstb.2014.0064>
- 735 41. Timmermann A, Friedrich T. Late Pleistocene climate drivers of early human  
736 migration. *Nature*. 2016; 538, 92-95.
- 737 42. Lamb HF, Bates CR, Bryant CL, Davies SJ, Huws DG, Marshall MH, et al. 150,000-year  
738 palaeoclimate record from northern Ethiopia supports early, multiple dispersals of  
739 modern humans from Africa. *Sci Rep*. 2018; 8(1): 1077.
- 740 43. Kolodny O, Feldman MW. A parsimonious neutral model suggests Neanderthal  
741 replacement was determined by migration and random species drift. *Nat Commun*.  
742 2017; 8(1): 1040.
- 743 44. Bocquet-Appel JP, Demars PY. Population Kinetics in the Upper Palaeolithic in  
744 Western Europe. *J Archaeol Sci*. 2000; 27: 551-570, doi:10.1006/jasc.1999.0471
- 745 45. Bocquet-Appel JP, Demars PY, Noiret L, Dobrowsky D. Estimates of Upper Palaeolithic  
746 meta-population size in Europe from archaeological data. *Journal of Archaeological*  
747 *Science*. 2005; 32: 1656-1668, doi:10.1016/j.jas.2005.05.006

- 748 46. Bocquet-Appel JP, Degioanni A. Neanderthal Demographic Estimates. *Curr Anthropol*.  
749 2013; 54: S202-S213, doi:10.1086/673725
- 750 47. Blum MGB, Jakobsson M. Deep Divergences of Human Gene Trees and Models of  
751 Human Origins. *Mol Biol Evol*. 2011; 28: 889–898, doi 10.1093/molbev/msq265.
- 752 48. Hoban S, Bertorelle G, Gaggiotti OE. Computer simulations: tools for population and  
753 evolutionary genetics. *Nat Rev*. 2012; 13: 110-122. doi:10.1038/nrg3130.
- 754 49. Liu H, Prugnolle F, Manica A, Balloux F. A geographically explicit genetic model of  
755 worldwide human-settlement history. *Am J Hum Genet*. 2006; 79: 230–237.
- 756 50. Ray N, Currat M, Foll M, Excoffier L. SPLATCHE2: A spatially explicit simulation  
757 framework for complex demography, genetic admixture and recombination.  
758 *Bioinformatics*. 2010; 26: 2993–2994.
- 759 51. Barton CM, Riel-Salvatore J. Agents of change: modeling biocultural evolution in Upper  
760 Pleistocene western Eurasia. *Adv Complex Syst*. 2012; 15: 1150003, doi:  
761 10.1142/S0219525911003359.
- 762 52. Benguigui M, Arenas M. Spatial and Temporal Simulation of Human Evolution.  
763 *Methods, Frameworks and Applications*. *Curr Genomics*. 2014; 15: 245-255.
- 764 53. Rikvold PA, Zia RKP. Punctuated equilibria and 1/f noise in a biological coevolution  
765 model with individual-based dynamics. *Phys Rev E*. 2003; 68: 031913, Doi:  
766 10.1103/PhysRevE.68.031913.
- 767 54. Whitlock MC. Fixation Probability and Time in Subdivided Populations. *Genetics*.  
768 2003; 164: 767–779.
- 769 55. Fisher RA. *The Genetical Theory of Natural Selection*. Oxford: Oxford University Press;  
770 1930.

- 771 56. Fisher RA. The wave of advance of advantageous genes. *Ann Eugen.* 1937; 7: 355-369.  
772 doi: 10.1111/j.1469-1809.1937.tb02153.x.
- 773 57. Kimura O, Ohta T. The average number of generations until fixation of a mutant gene  
774 in a finite population. *Genetics.* 1969; 61: 763-771.
- 775 58. Gavrilets S. Perspective: Models of speciation: what have we learned in 40 years?  
776 *Evolution.* 2013; 57: 2197-2215.
- 777 59. Haldane JBS. A mathematical theory of natural and artificial selection. V *Proc Camb*  
778 *Philos Soc.* 1927; 23:838 – 844.
- 779 60. Wright S. Evolution in Mendelian populations. *Genetics.* 1931; 16: 97-159.
- 780 61. Lande R. Natural selection and random genetic drift in phenotypic evolution.  
781 *Evolution.* 1976; 30: 314-334.
- 782 62. Wolpoff MH, Hawks J, Caspari R. Multiregional, Not Multiple Origins. *Am J Phys*  
783 *Anthropol.* 2000; 112: 129-136
- 784 63. Winder IC, Winder NP. Reticulate evolution and the human past: an anthropological  
785 perspective. *Ann Hum Biol.* 2014; 41: 300–311, doi: 10.3109/03014460.2014.922613
- 786 64. Bae CJ, Douka K, Petraglia MD. Human Colonization of Asia in the Late Pleistocene –  
787 An introduction to Supplement 17. *Curr Anthropol.* 2017; 58(17): S373 – S382.
- 788 65. Galway-Witham J, Stringer C. How did *Homo sapiens* evolve? *Science.* 2018; 360:  
789 1296-1298
- 790 66. Scerri EML, Thomas MG, Manica A, Gunz P, Stock JT, Stringer C. Did Our Species Evolve  
791 in Subdivided Populations across Africa, and Why Does It Matter? *Trends Ecol Evol.*  
792 2018; Doi: 10.1016/j.tree.2018.05.005.

- 793 67. Shennan SJ, Crema ER, Kerig T. Isolation-by-distance, homophily and ‘core’ vs.  
794 ‘package’ cultural evolution models in Neolithic Europe. *Evol Hum Behav.* 2015; 36:  
795 103–109
- 796 68. Gould SJ, Eldredge N. Punctuated equilibria: the tempo and mode of evolution  
797 reconsidered. *Paleobiology.* 1977; 3: 115-151;
- 798 69. Gould SJ, Eldredge N. Punctuated equilibrium comes of age. *Nature.* 1993; 366: 223-  
799 227
- 800 70. Bak P, Boettcher S. Self-organized criticality and punctuated equilibria. *Physica D.*  
801 1997; 107: 143-150.
- 802 71. Excoffier L, Foll M, Petit RJ. Genetic Consequences of Range Expansions. *Annu Rev Ecol*  
803 *Evol Syst.* 2009; 40: 481–501.
- 804 72. Ramachandran S, Deshpande O, Roseman CC, Rosenberg NA, Feldman MW, Cavalli-  
805 Sforza LL. Support from the relationship of genetic and geographic distance in human  
806 populations for a serial founder effect originating in Africa. *Proc Natl Acad Sci.* 2005;  
807 102:15942–15947.
- 808 73. Sugden LA, Ramachandran S. Integrating the signatures of demic expansion and  
809 archaic introgression in studies of human population genomics. *Curr Opin Genet Dev.*  
810 2016; 41:140–149
- 811 74. Bak P, Tang C, Wiesenfeld K. Self-organized criticality, *Phys Rev A.* 1988; 38: 364–374.
- 812 75. Bak P, Sneppen K. Punctuated Equilibrium and Criticality in a Simple Model of  
813 Evolution. *Phys Rev Lett.* 1993; 71: 4083-4086.
- 814 76. Miller SA, Nur A. Permeability as a toggle switch in fluid-controlled crustal  
815 processes. *Earth Planet Sci Lett.* 2000; 183(1-2): 133-146.

- 816 77. Bons PD, van Milligen BP. A new experiment to model self-organized critical transport  
817 and accumulation of melt and hydrocarbons from their source rocks. *Geology*. 2001;  
818 29: 919-922, doi: 10.1130/0091-7613
- 819 78. Sornette A, Sornette D. Self-organized criticality and earthquakes. *Europhys Lett*.  
820 1989; 9(3): 197.
- 821 79. Olami Z, Feder HJS, Christensen K. Self-organized criticality in a continuous,  
822 nonconservative cellular automaton modeling earthquakes. *Phys Rev Lett*.  
823 1992; 68(8): 1244.
- 824 80. Sánchez R, Newman DE, Carreras BA. Mixed SOC diffusive dynamics as a paradigm for  
825 transport in fusion devices. *Nuclear Fusion*. 2001; 41: 247-256.
- 826 81. Sachs MK, Yoder MR, Turcotte DL, Rundle JB, Malamud BD. Black swans, power laws,  
827 and dragon-kings: Earthquakes, volcanic eruptions, landslides, wildfires, floods, and  
828 SOC models. *Eur Phys J Spec Top*. 2012; 205: 167-182.
- 829 82. Sornette D, Ouillon G. Dragon-kings: mechanisms, statistical methods and empirical  
830 evidence. *Eur Phys J Spec Top*. 2012; 205(1): 1-26.
- 831 83. Freeman S, Herron JC. *Evolutionary analysis*. New Jersey: Prentice Hall; 2004.
- 832 84. Stringer C. The origin and evolution of *Homo sapiens*. *Phil Trans B*. 2016; 371:  
833 20150237.
- 834 85. Qiu J. The forgotten continent. *Nature*. 2016; 535:218-220.
- 835 86. Oppenheimer S. The great arc of dispersal of modern humans: Africa to Australia. *Quat*  
836 *Int*. 2009; 202: 2-13.

- 837 87. Reyes-Centeno H, Ghirotto S, Déroit F, Grimaud-Hervé D, Barbujani G, Harvati K.  
838 Genomic and cranial phenotype data support multiple modern human dispersals from  
839 Africa and a southern route into Asia. *Proc Natl Acad Sci U S A.* 2014; 111: 7248-7253.

$p = 0.0125, t = 990$

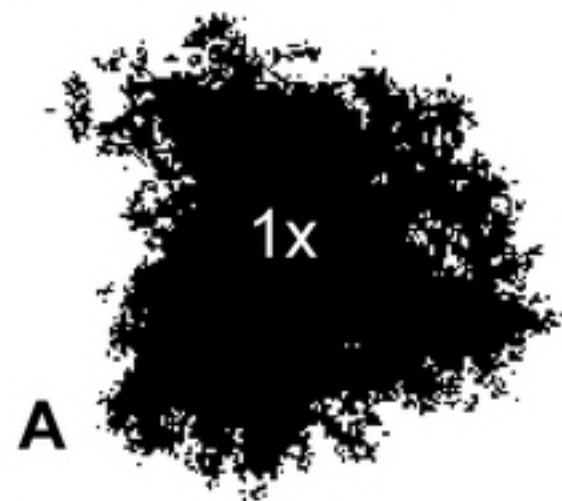

$p = 0.05, t = 410$

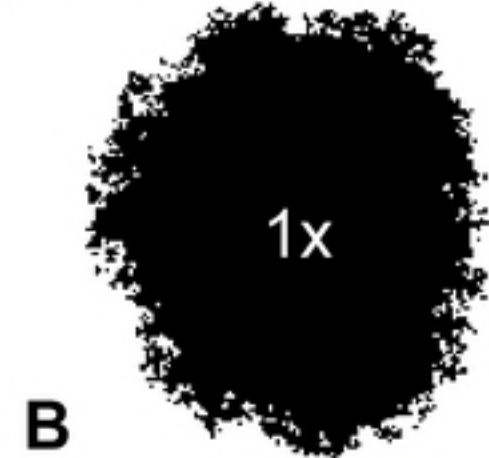

$p = 0.25, t = 170$

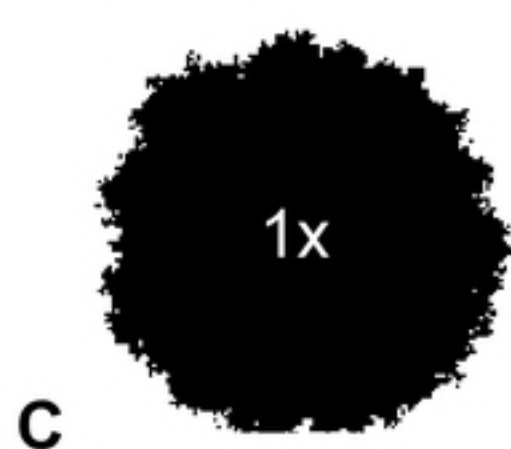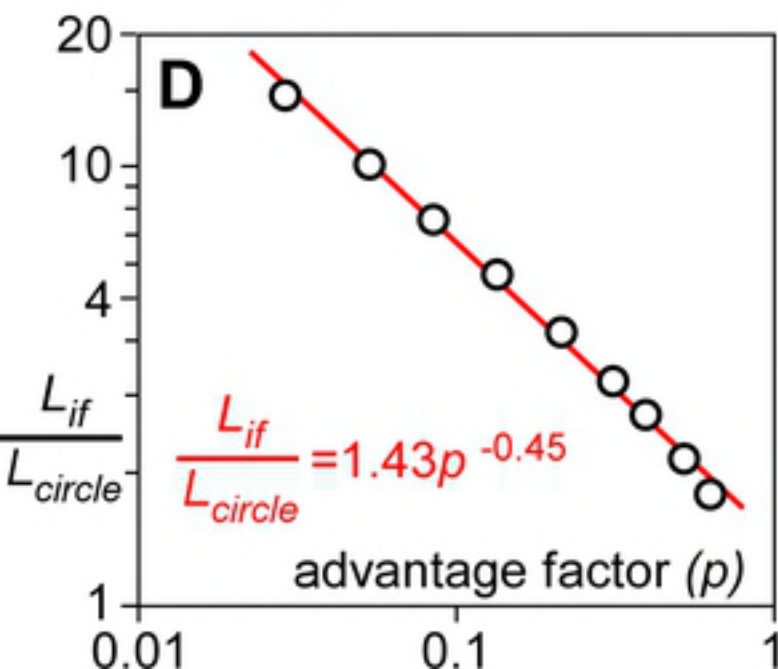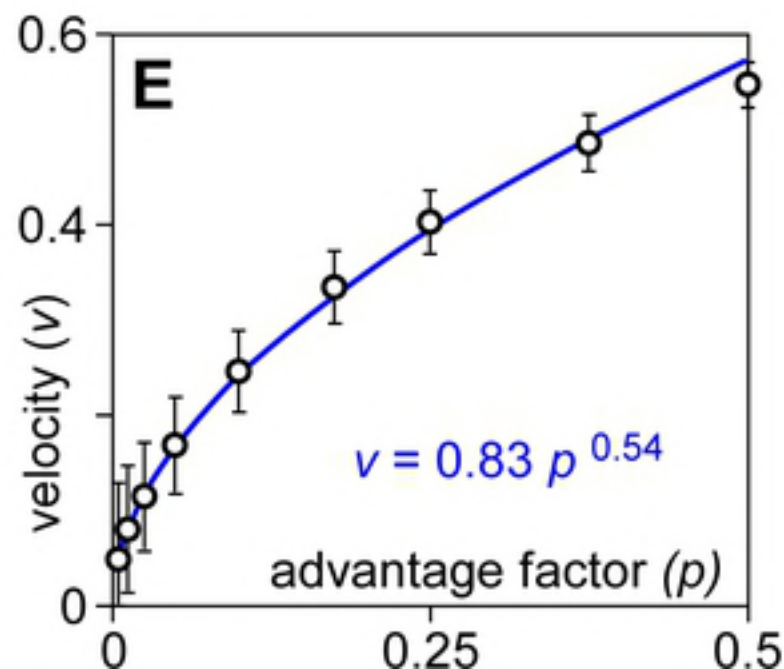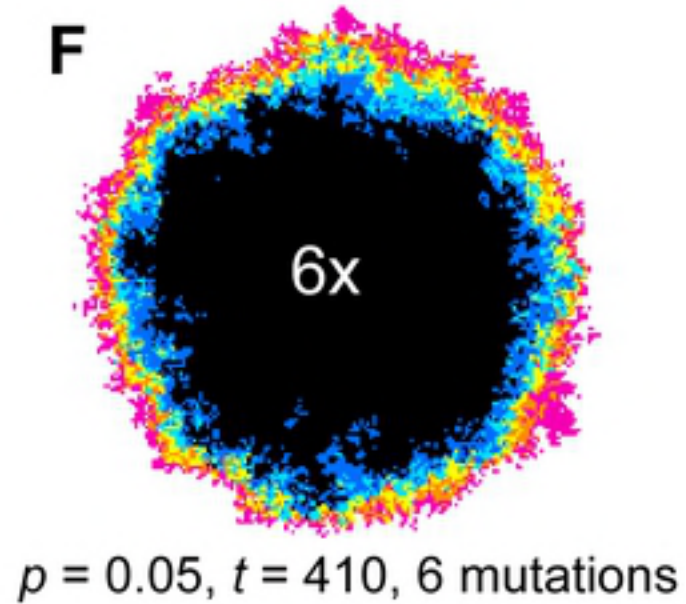

**A.** 4 mutations per step;  $p=0.05$ ;  $\alpha=0$ 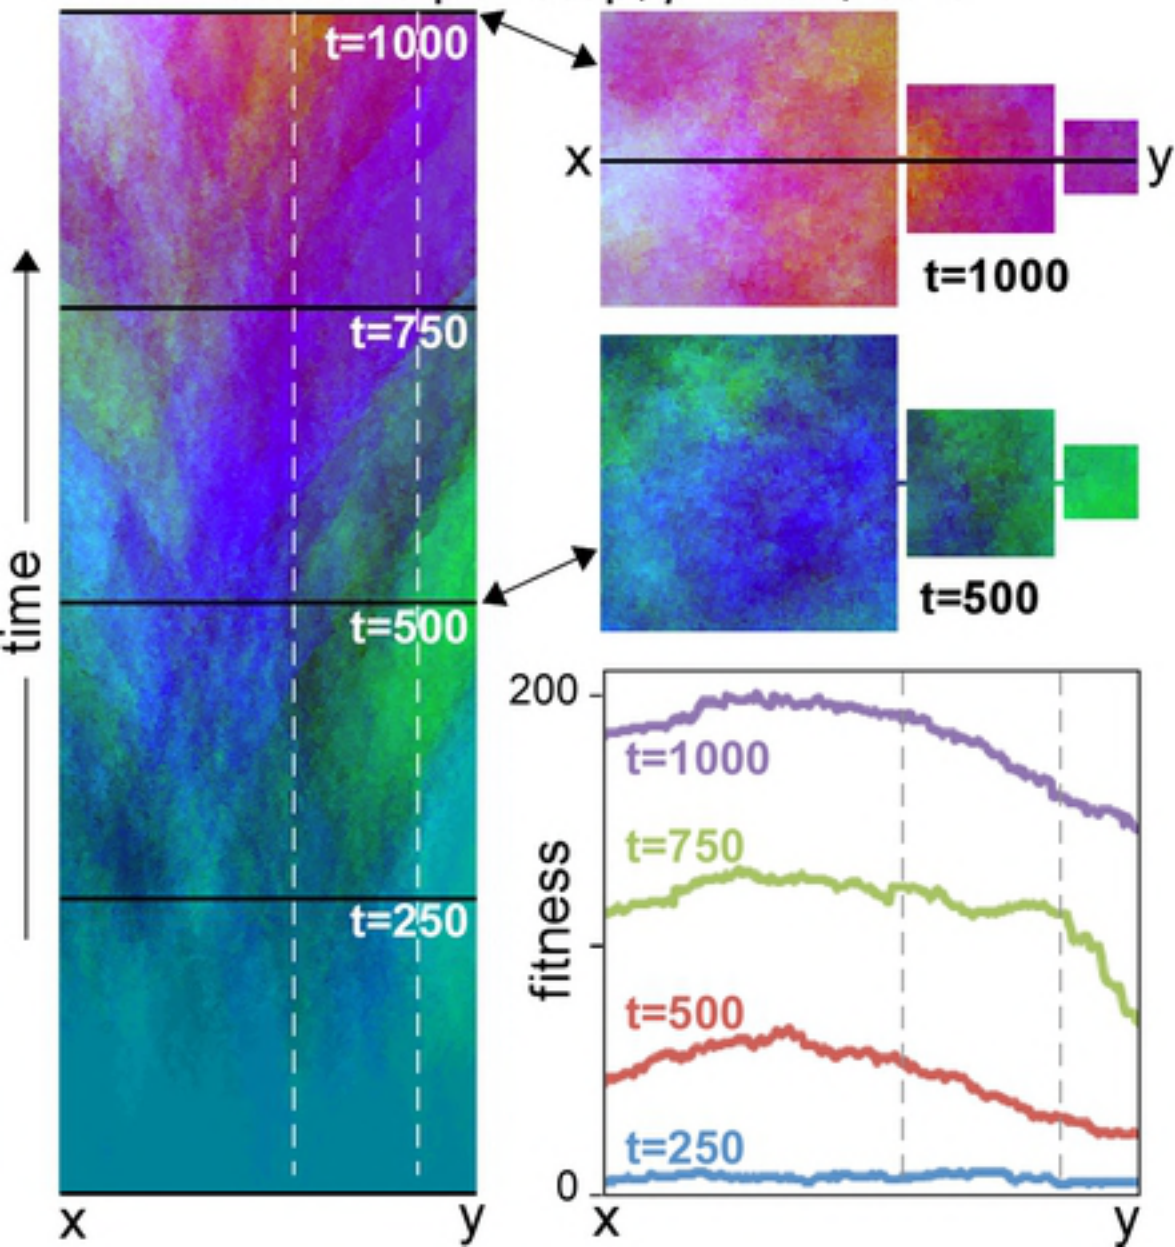**B.** 4 mutations per step;  $p=0.05$ ;  $\alpha=0.05$ 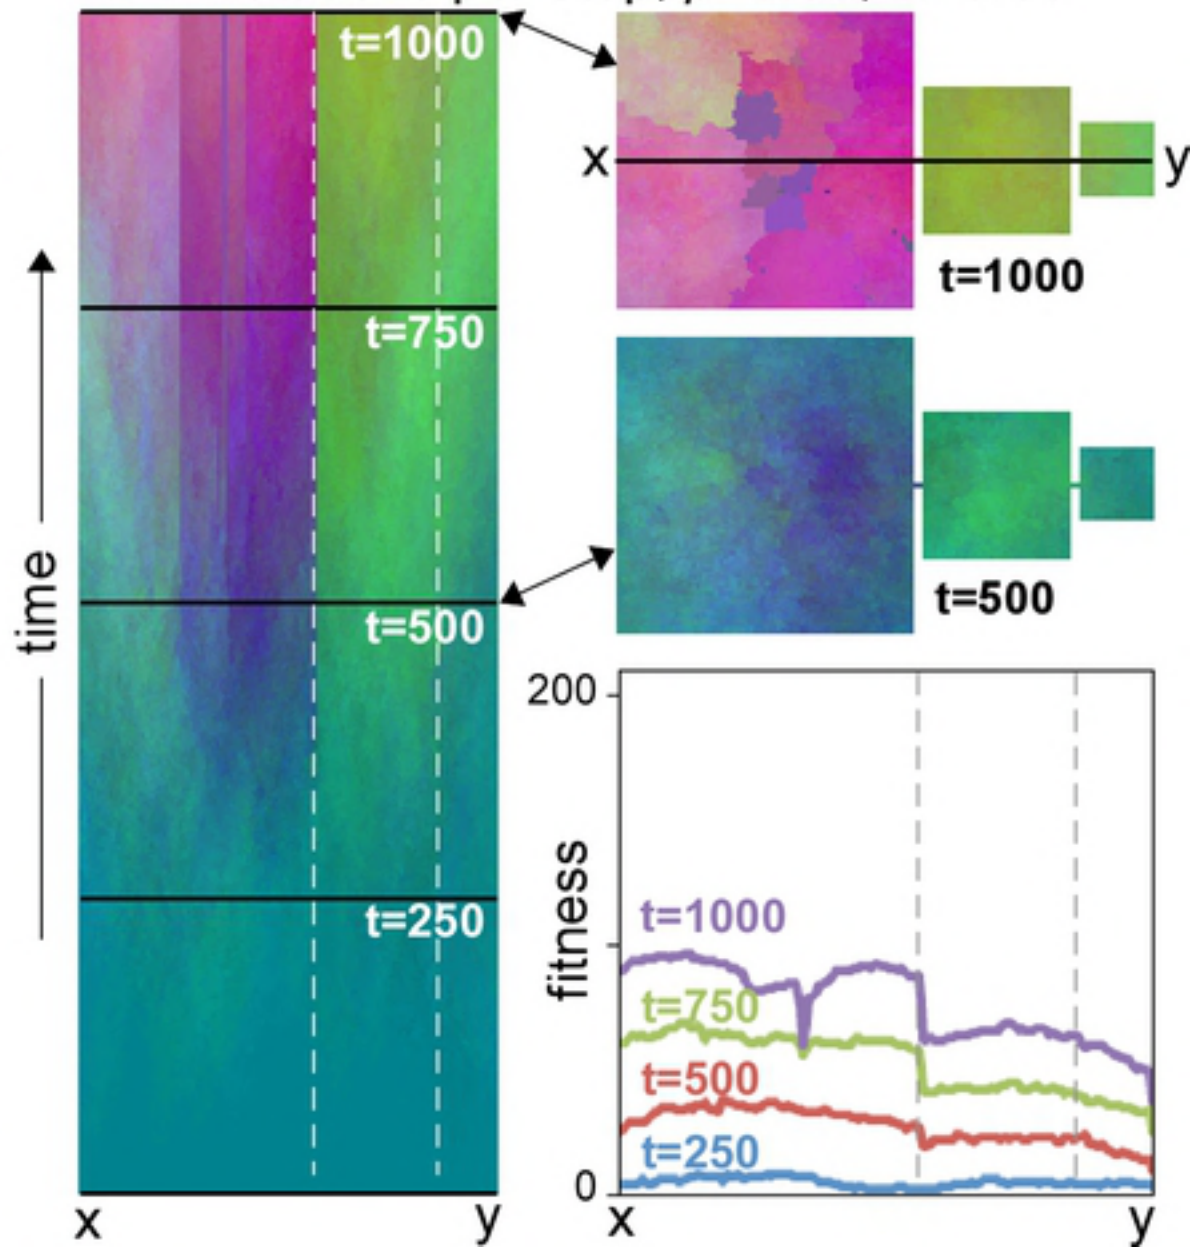



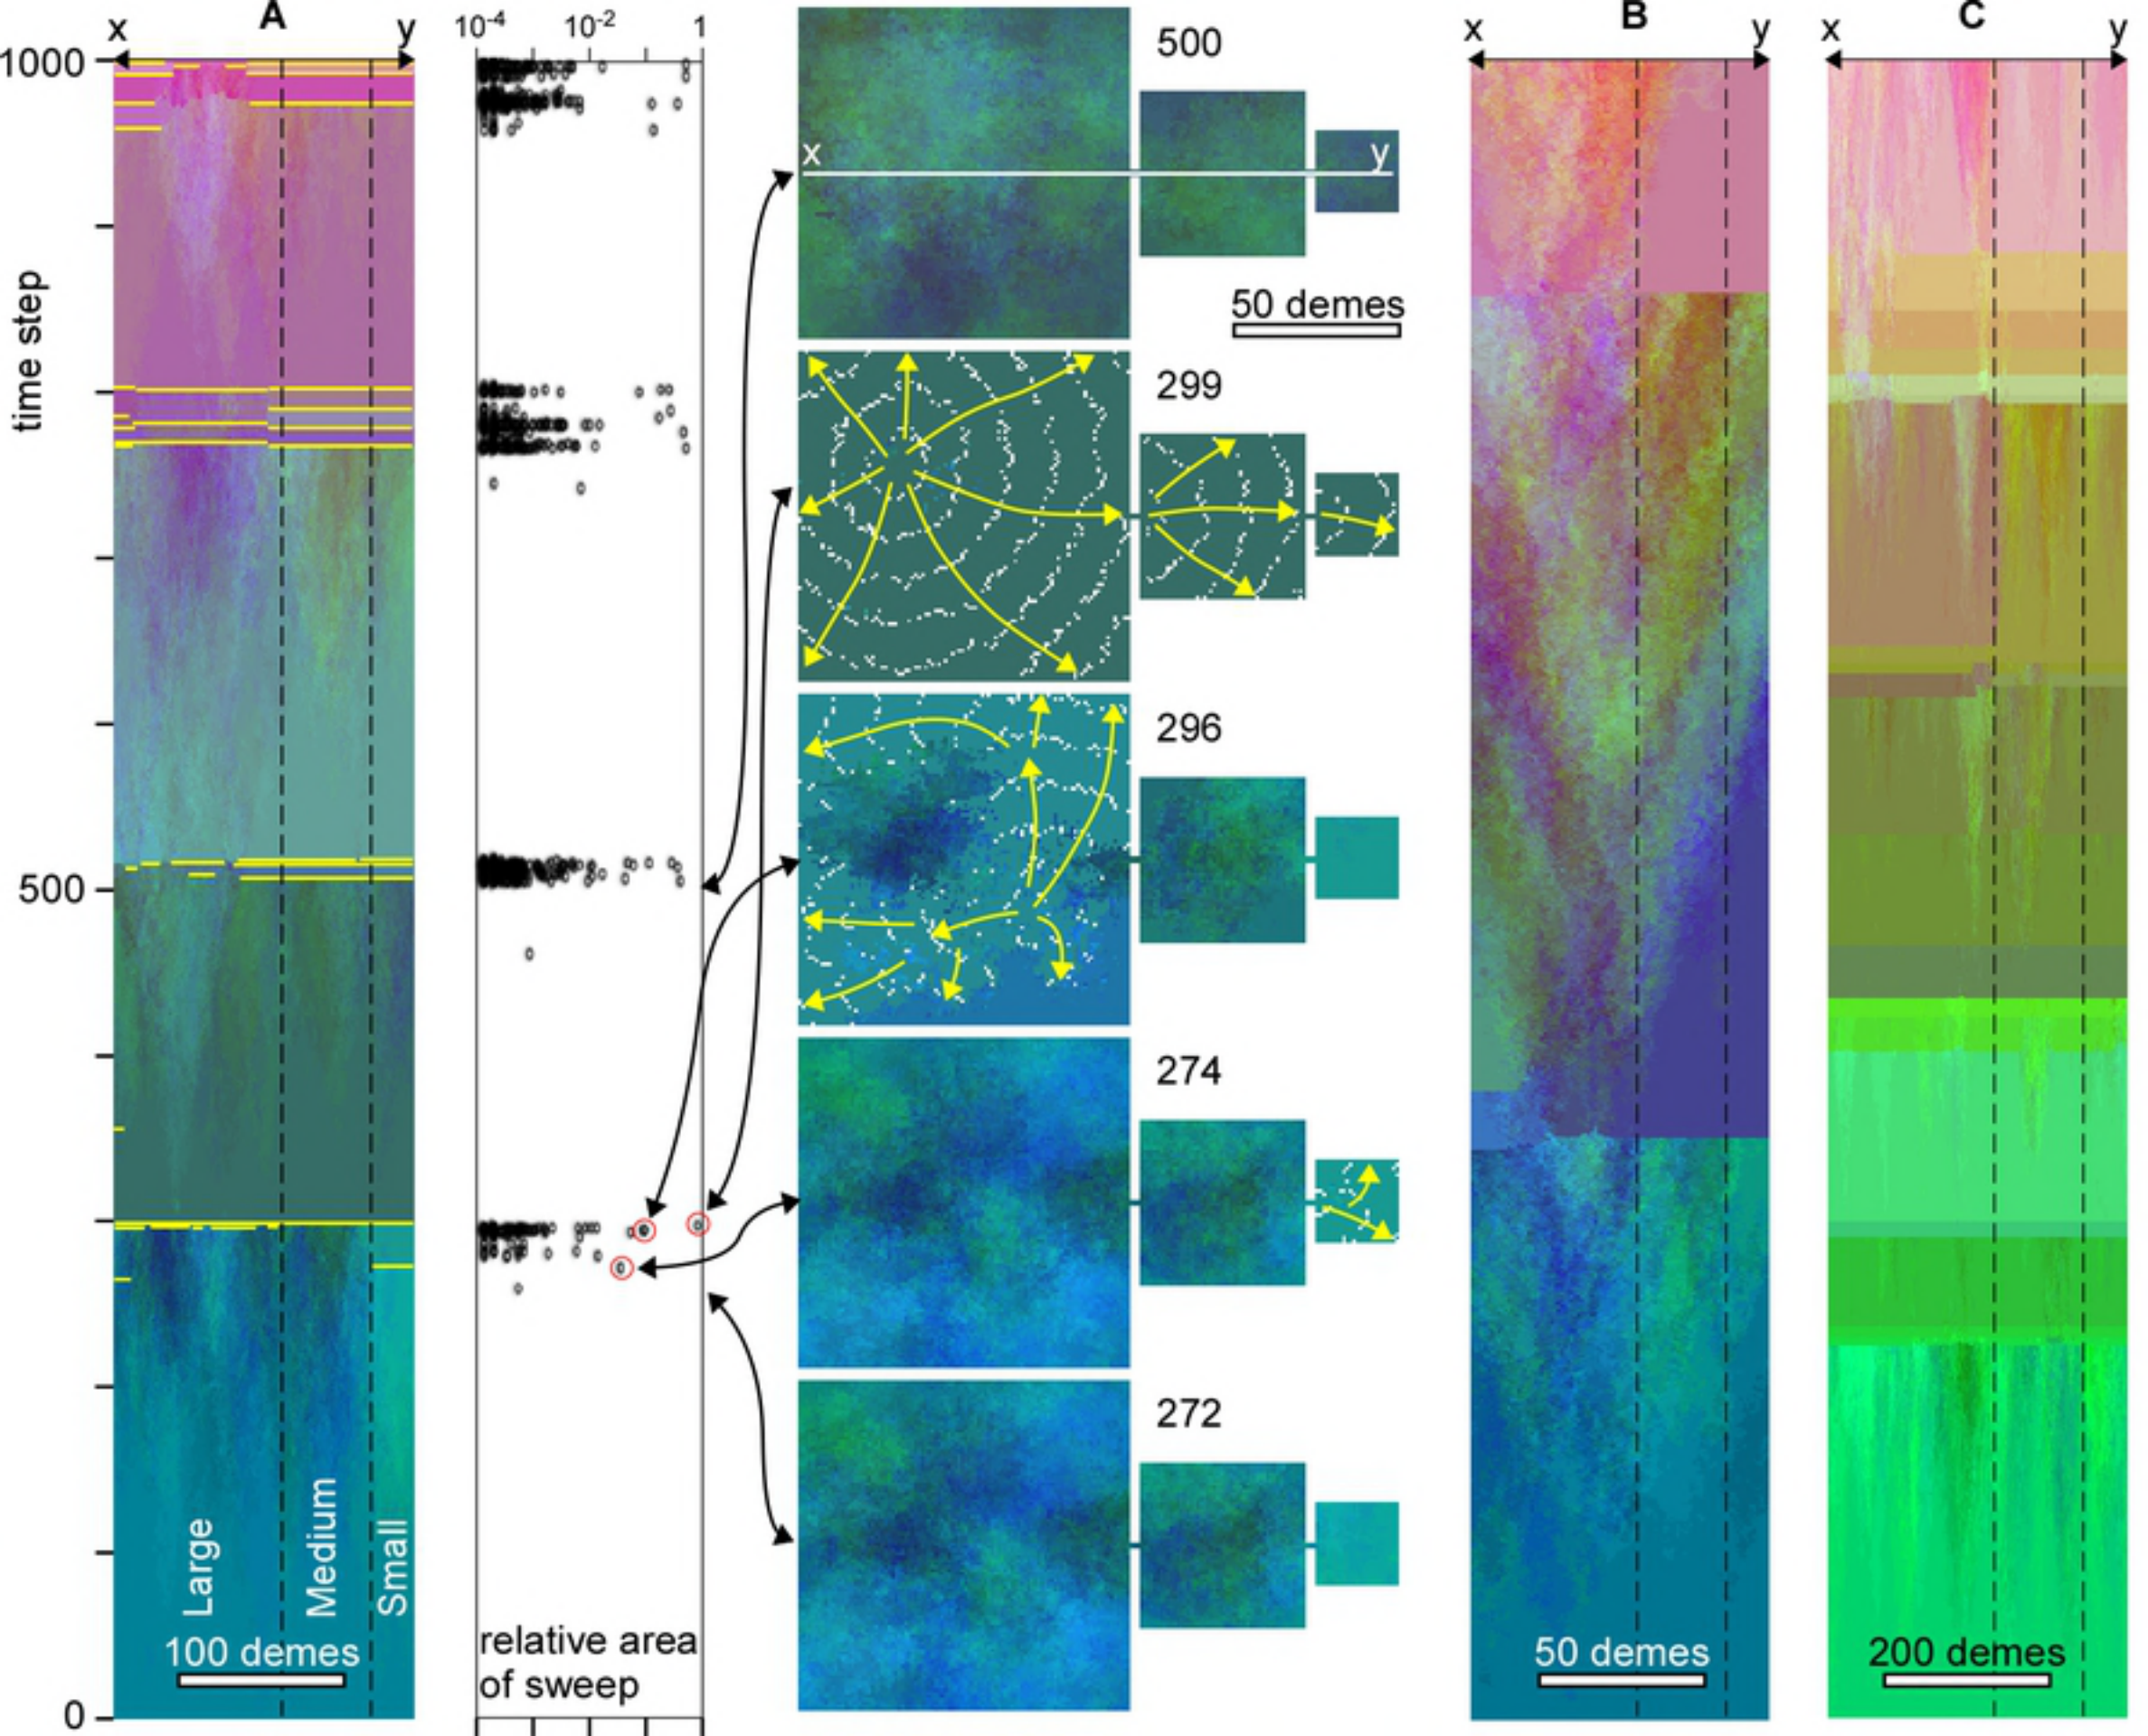

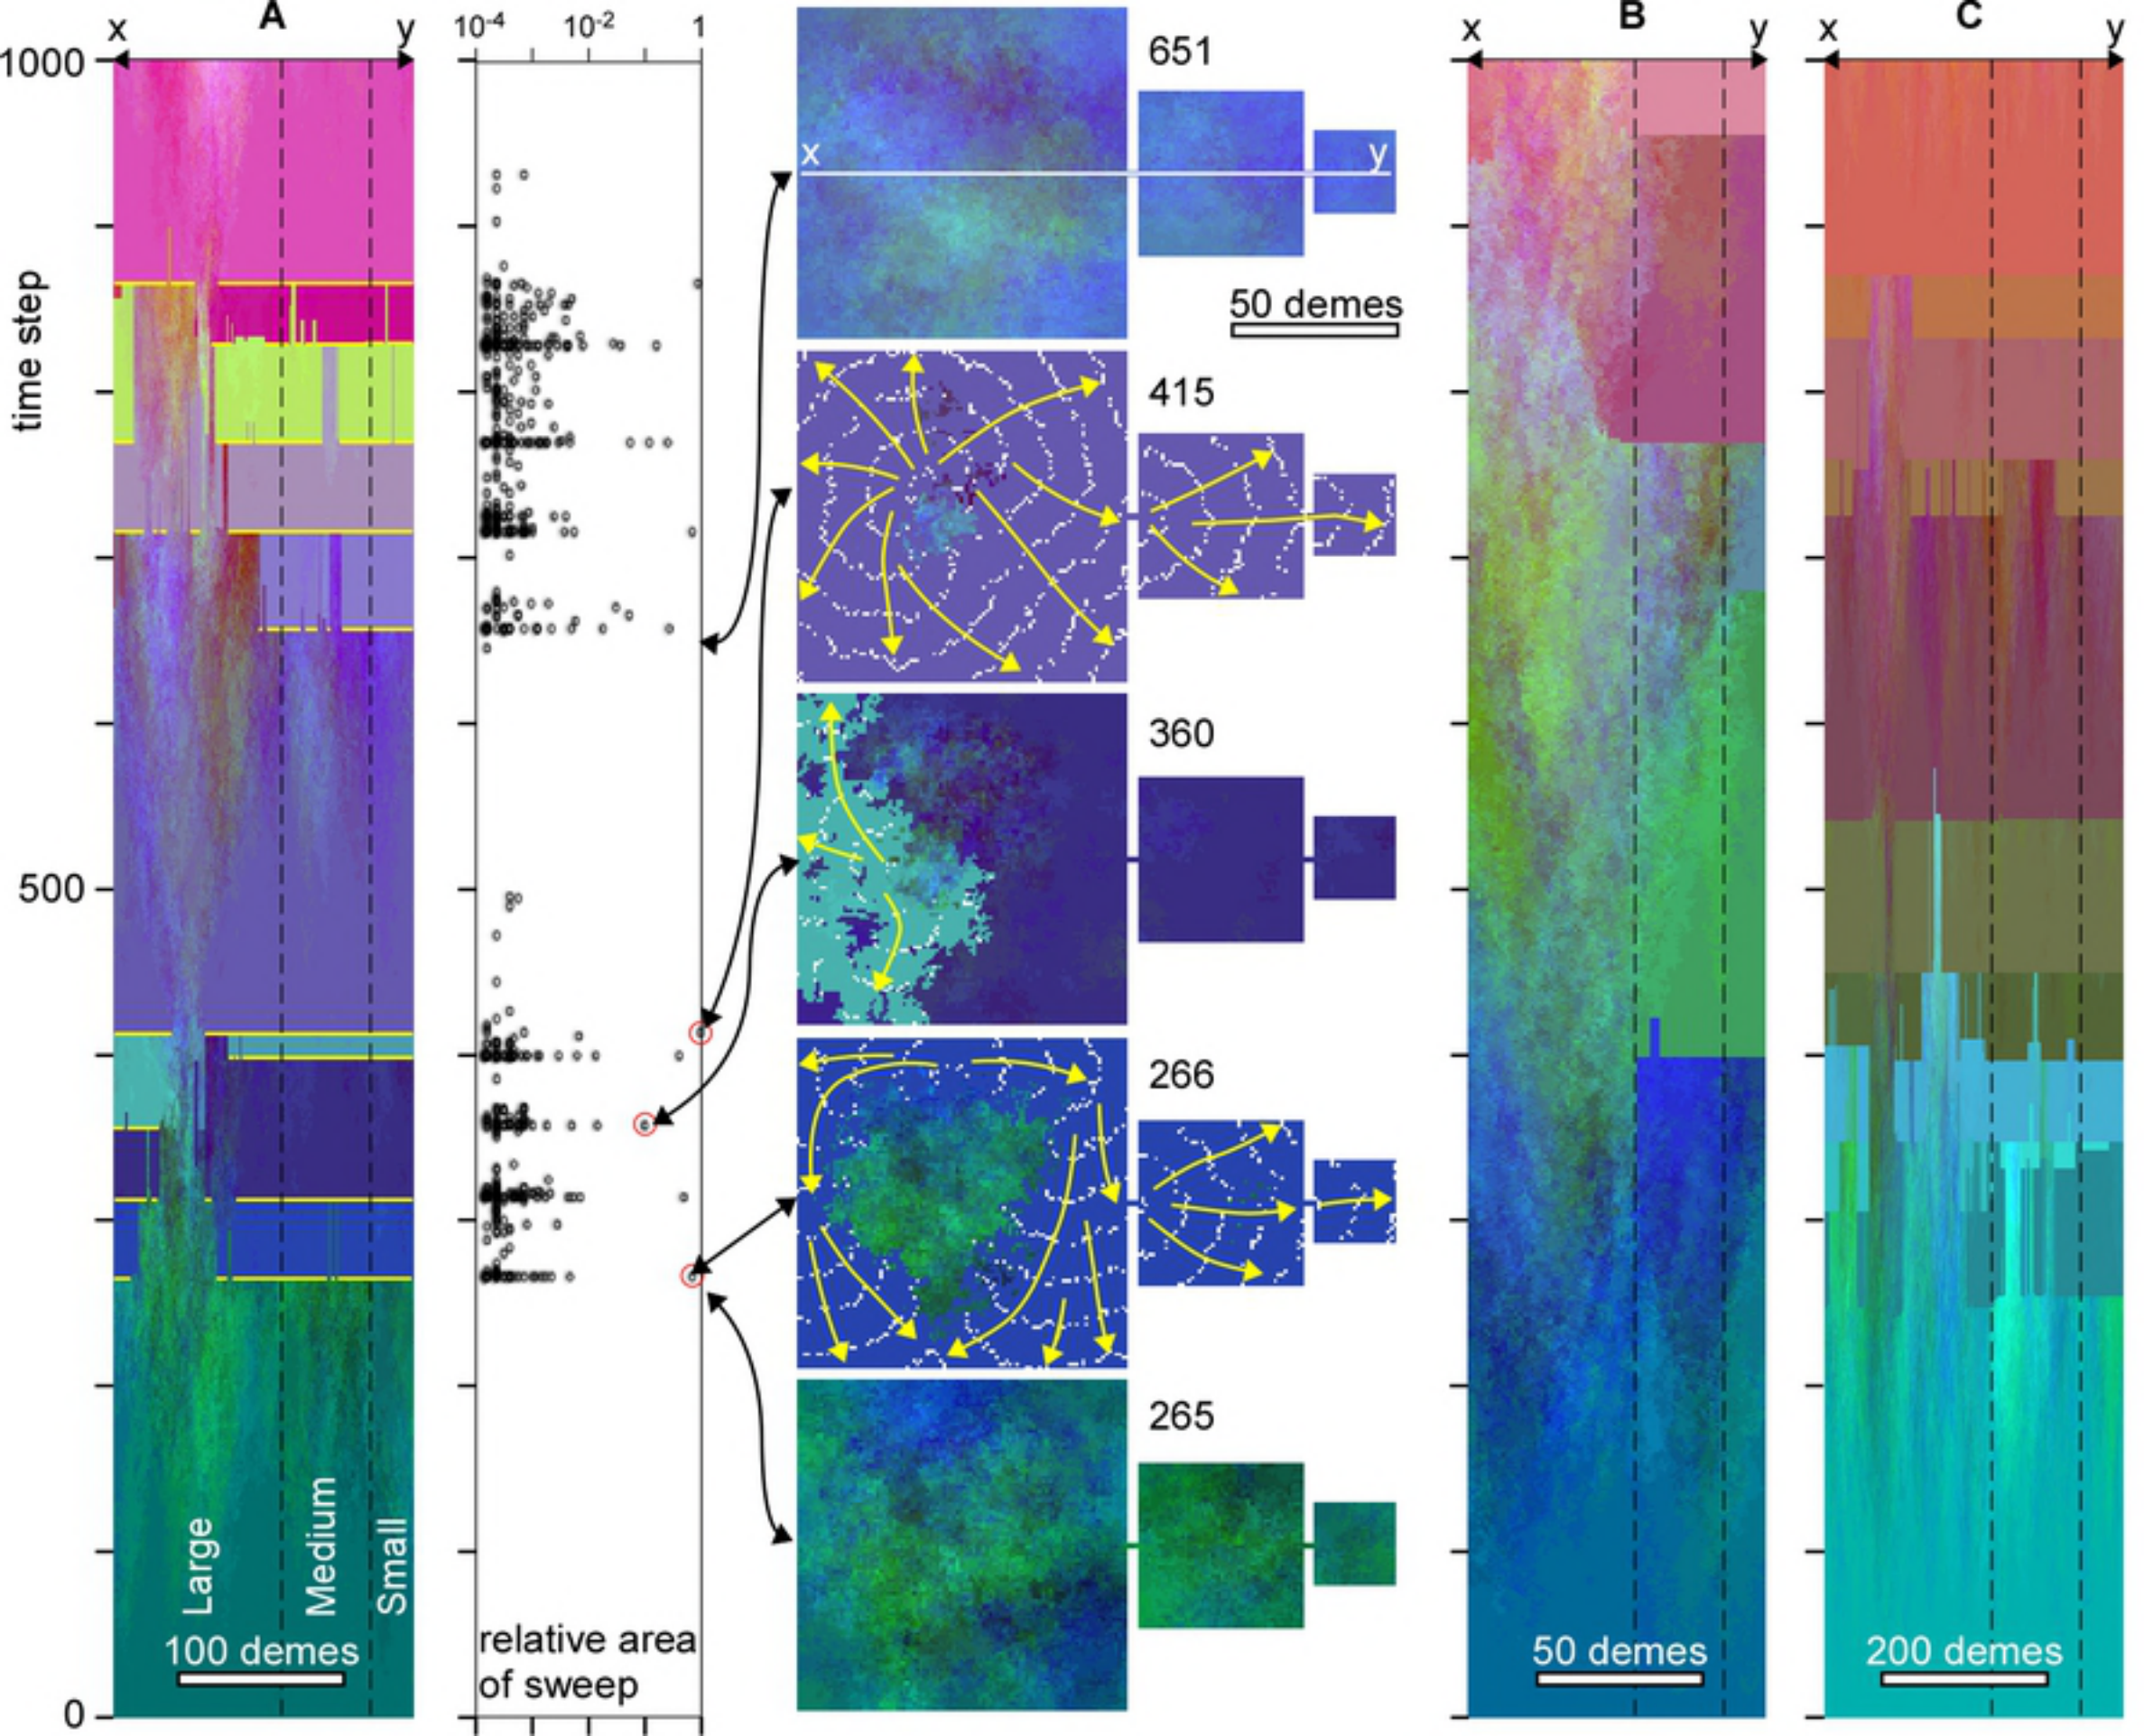

No assortive mating

A. Sweep frequency per deme

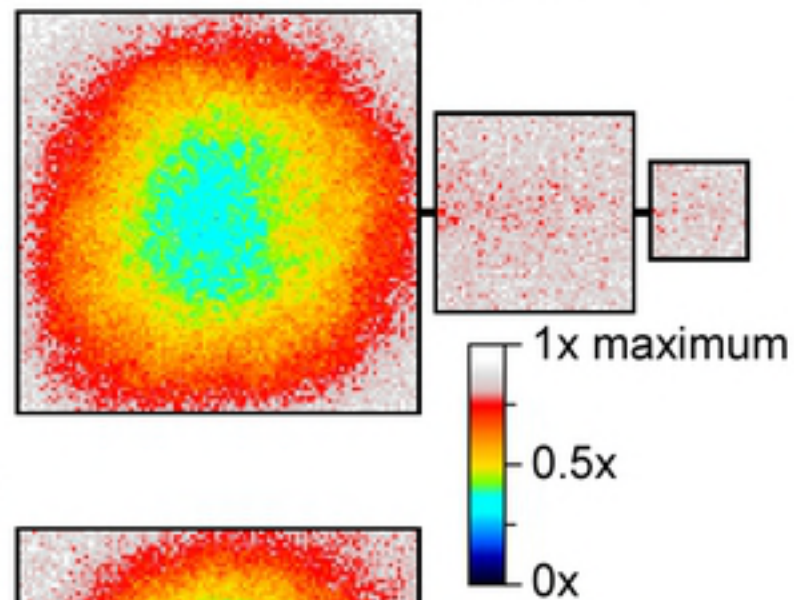

B. Origin of fixed mutations

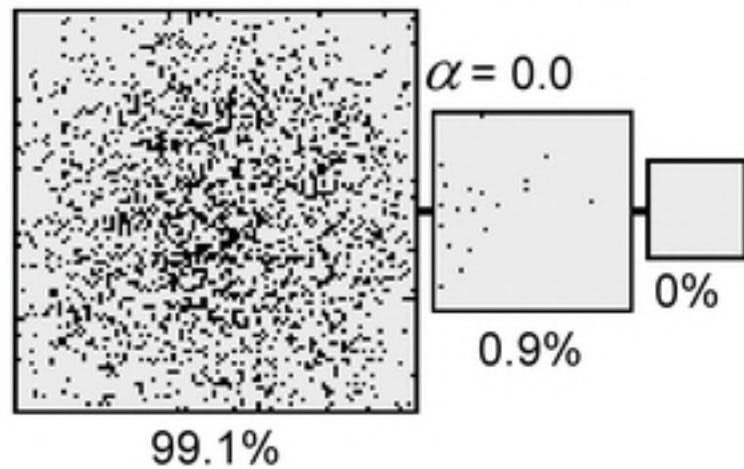

C. Average migration paths

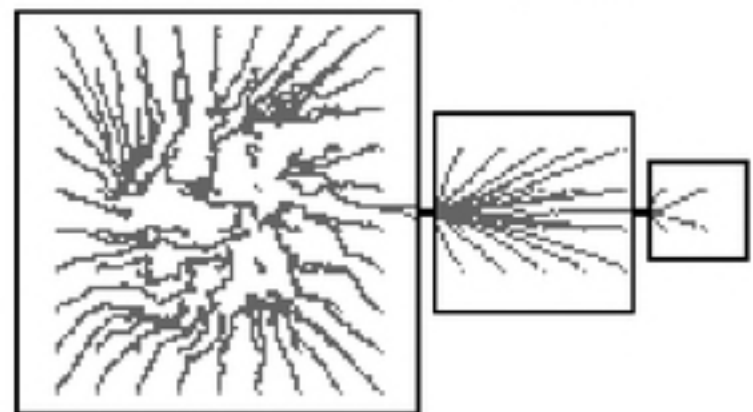

With assortive mating

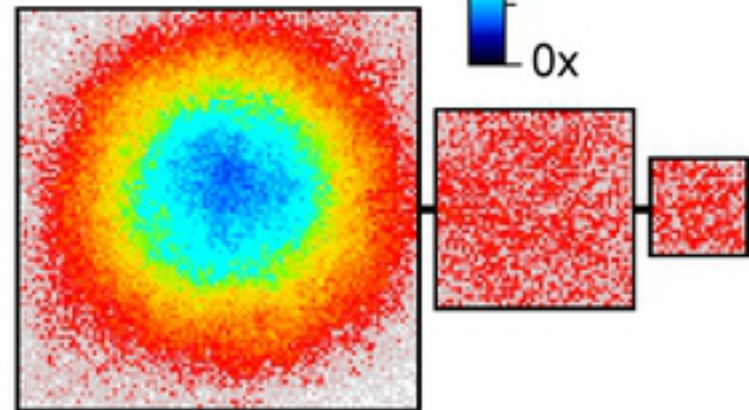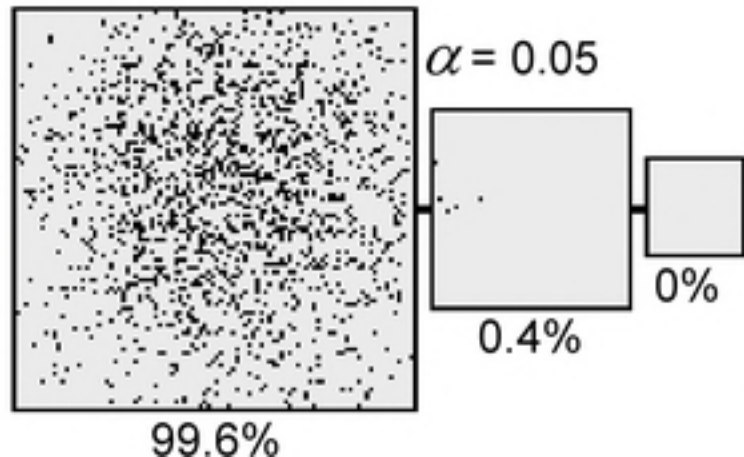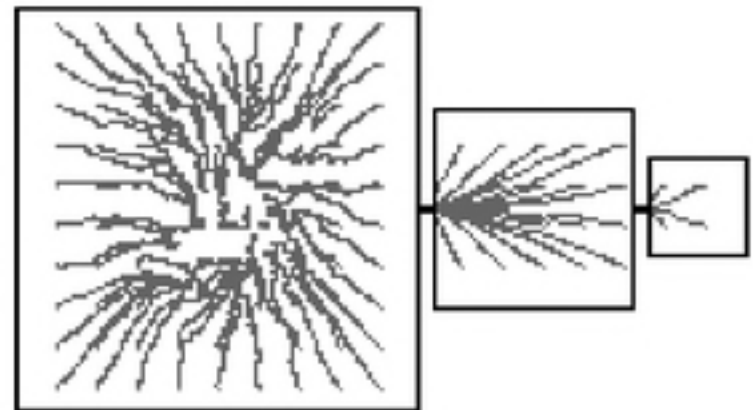

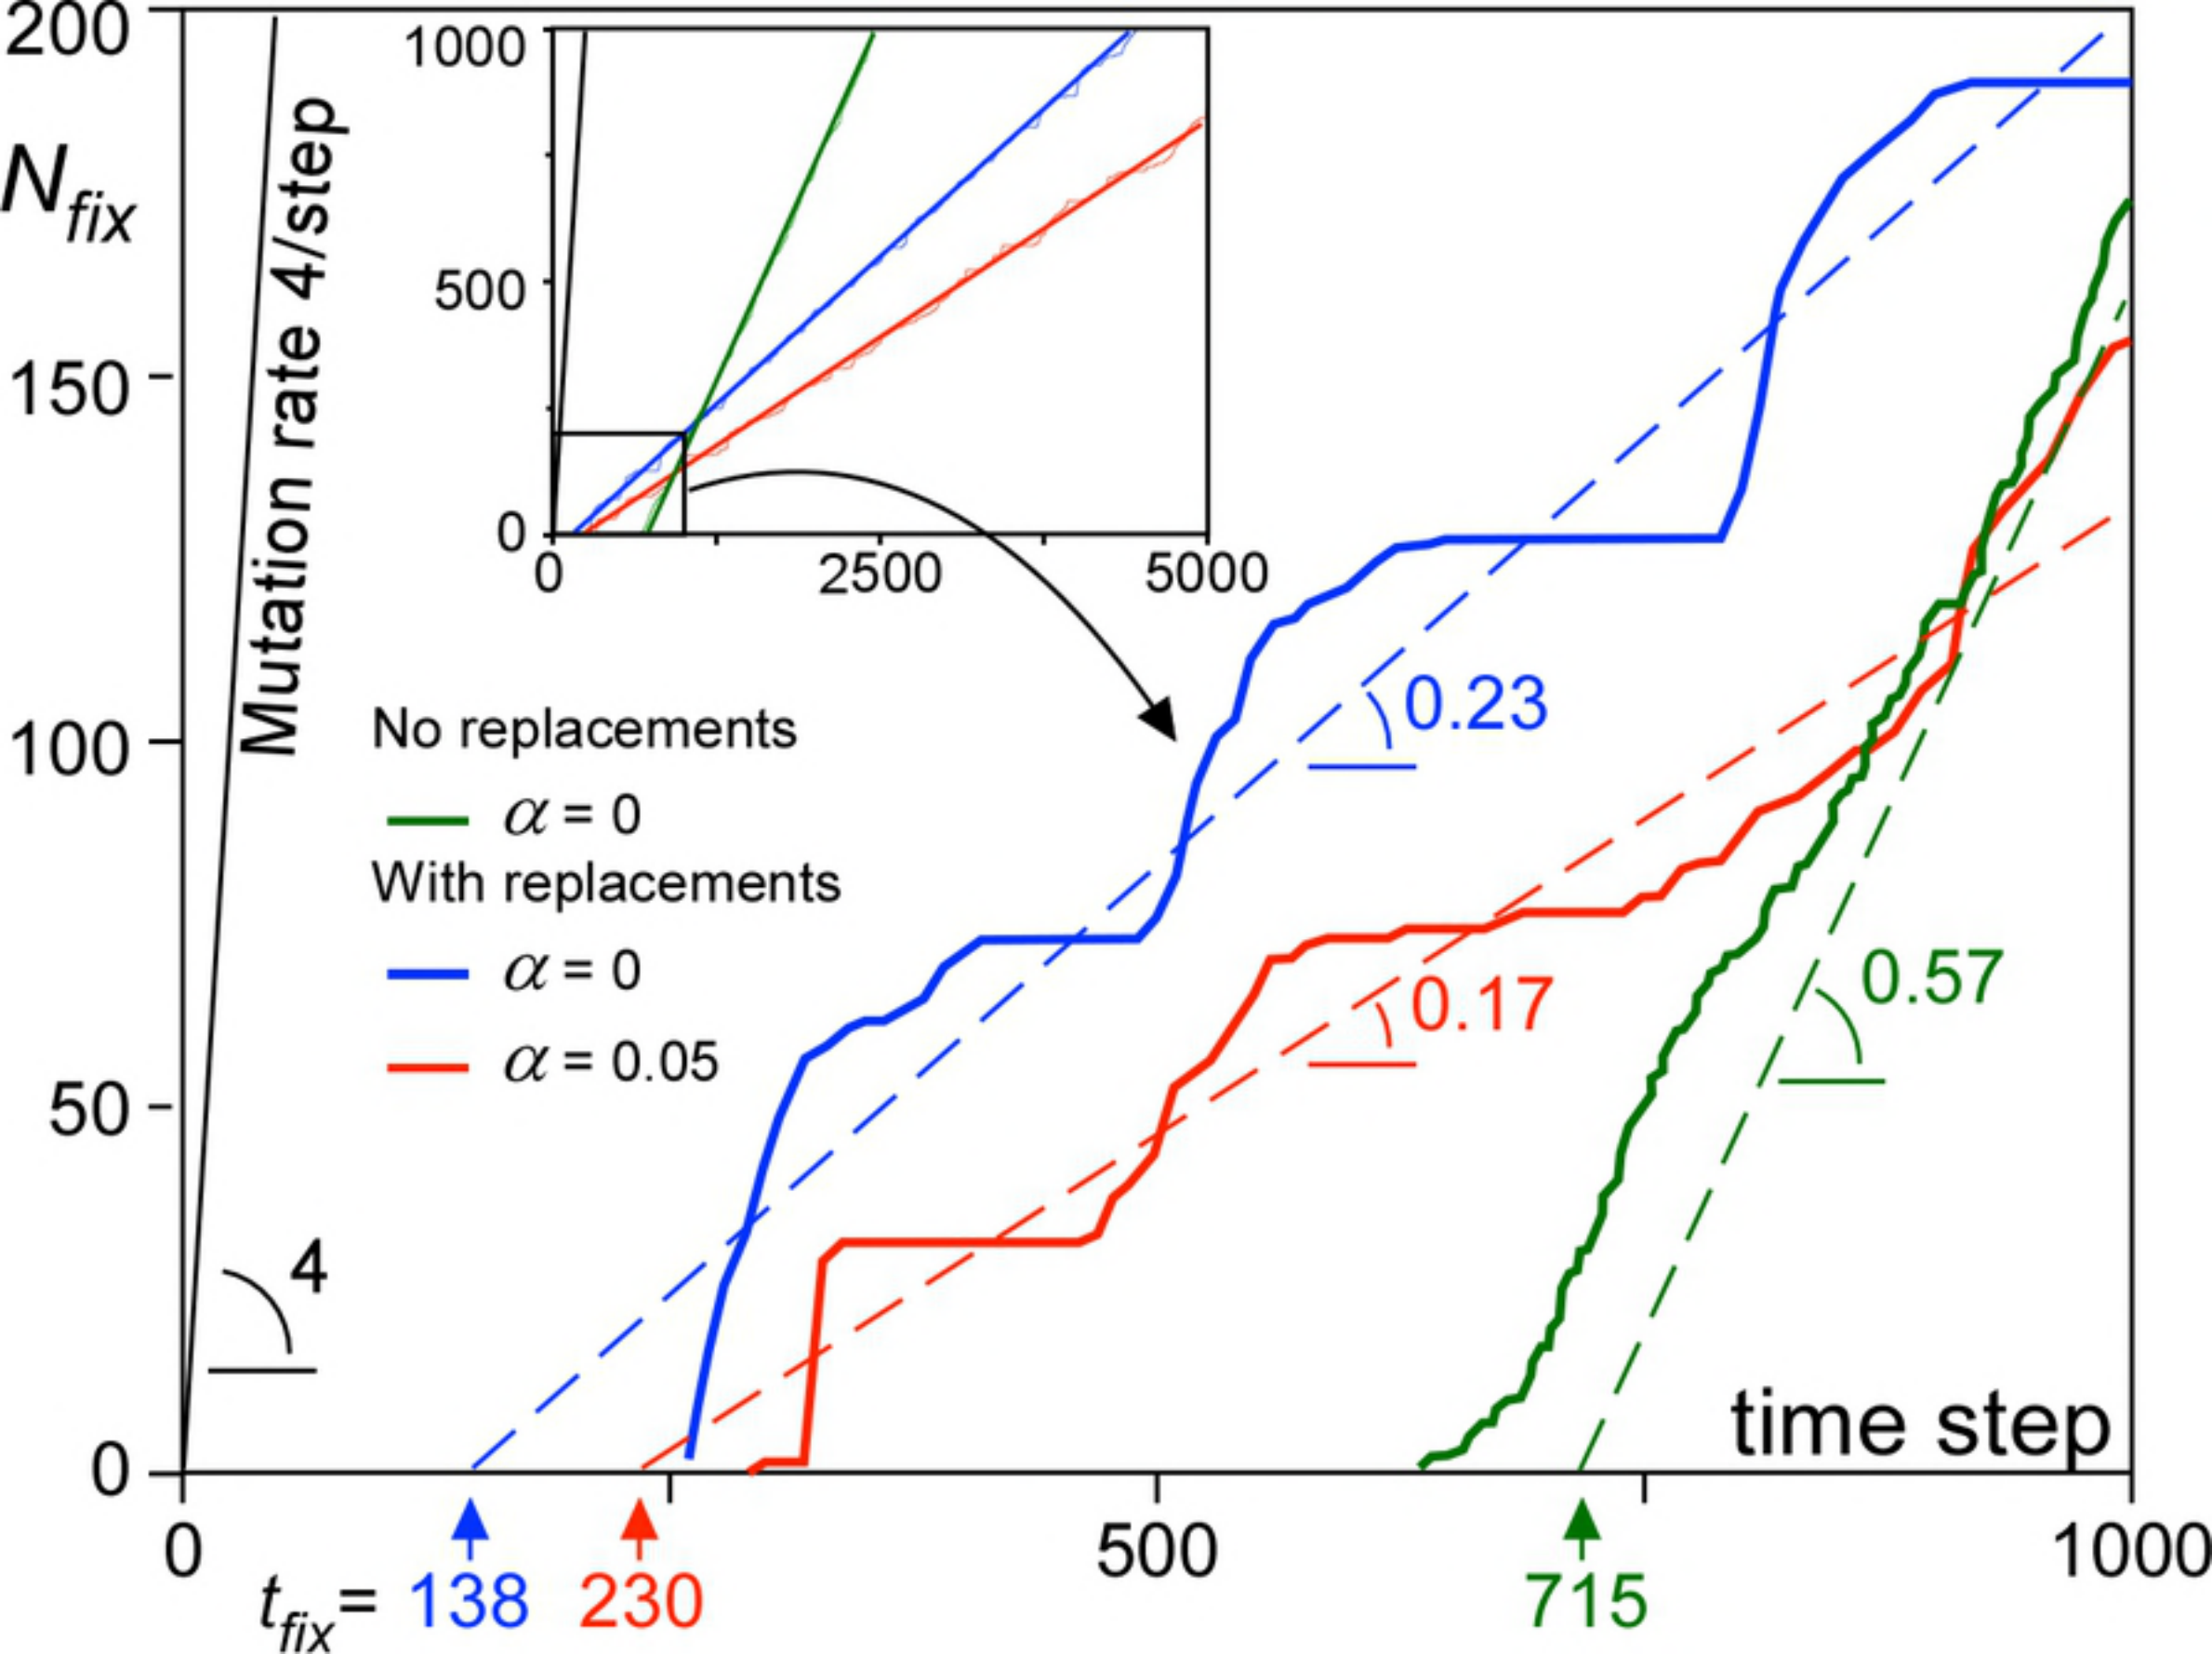

# Frequency distribution of sweep areas

bioRxiv preprint doi: <https://doi.org/10.1101/378695>; this version posted July 27, 2018. The copyright holder for this preprint (which was not certified by peer review) is the author/funder, who has granted bioRxiv a license to display the preprint in perpetuity. It is made available under aCC-BY 4.0 International license.

Power-law best fit

$$f_{(A)} \propto A^{-1.84}$$

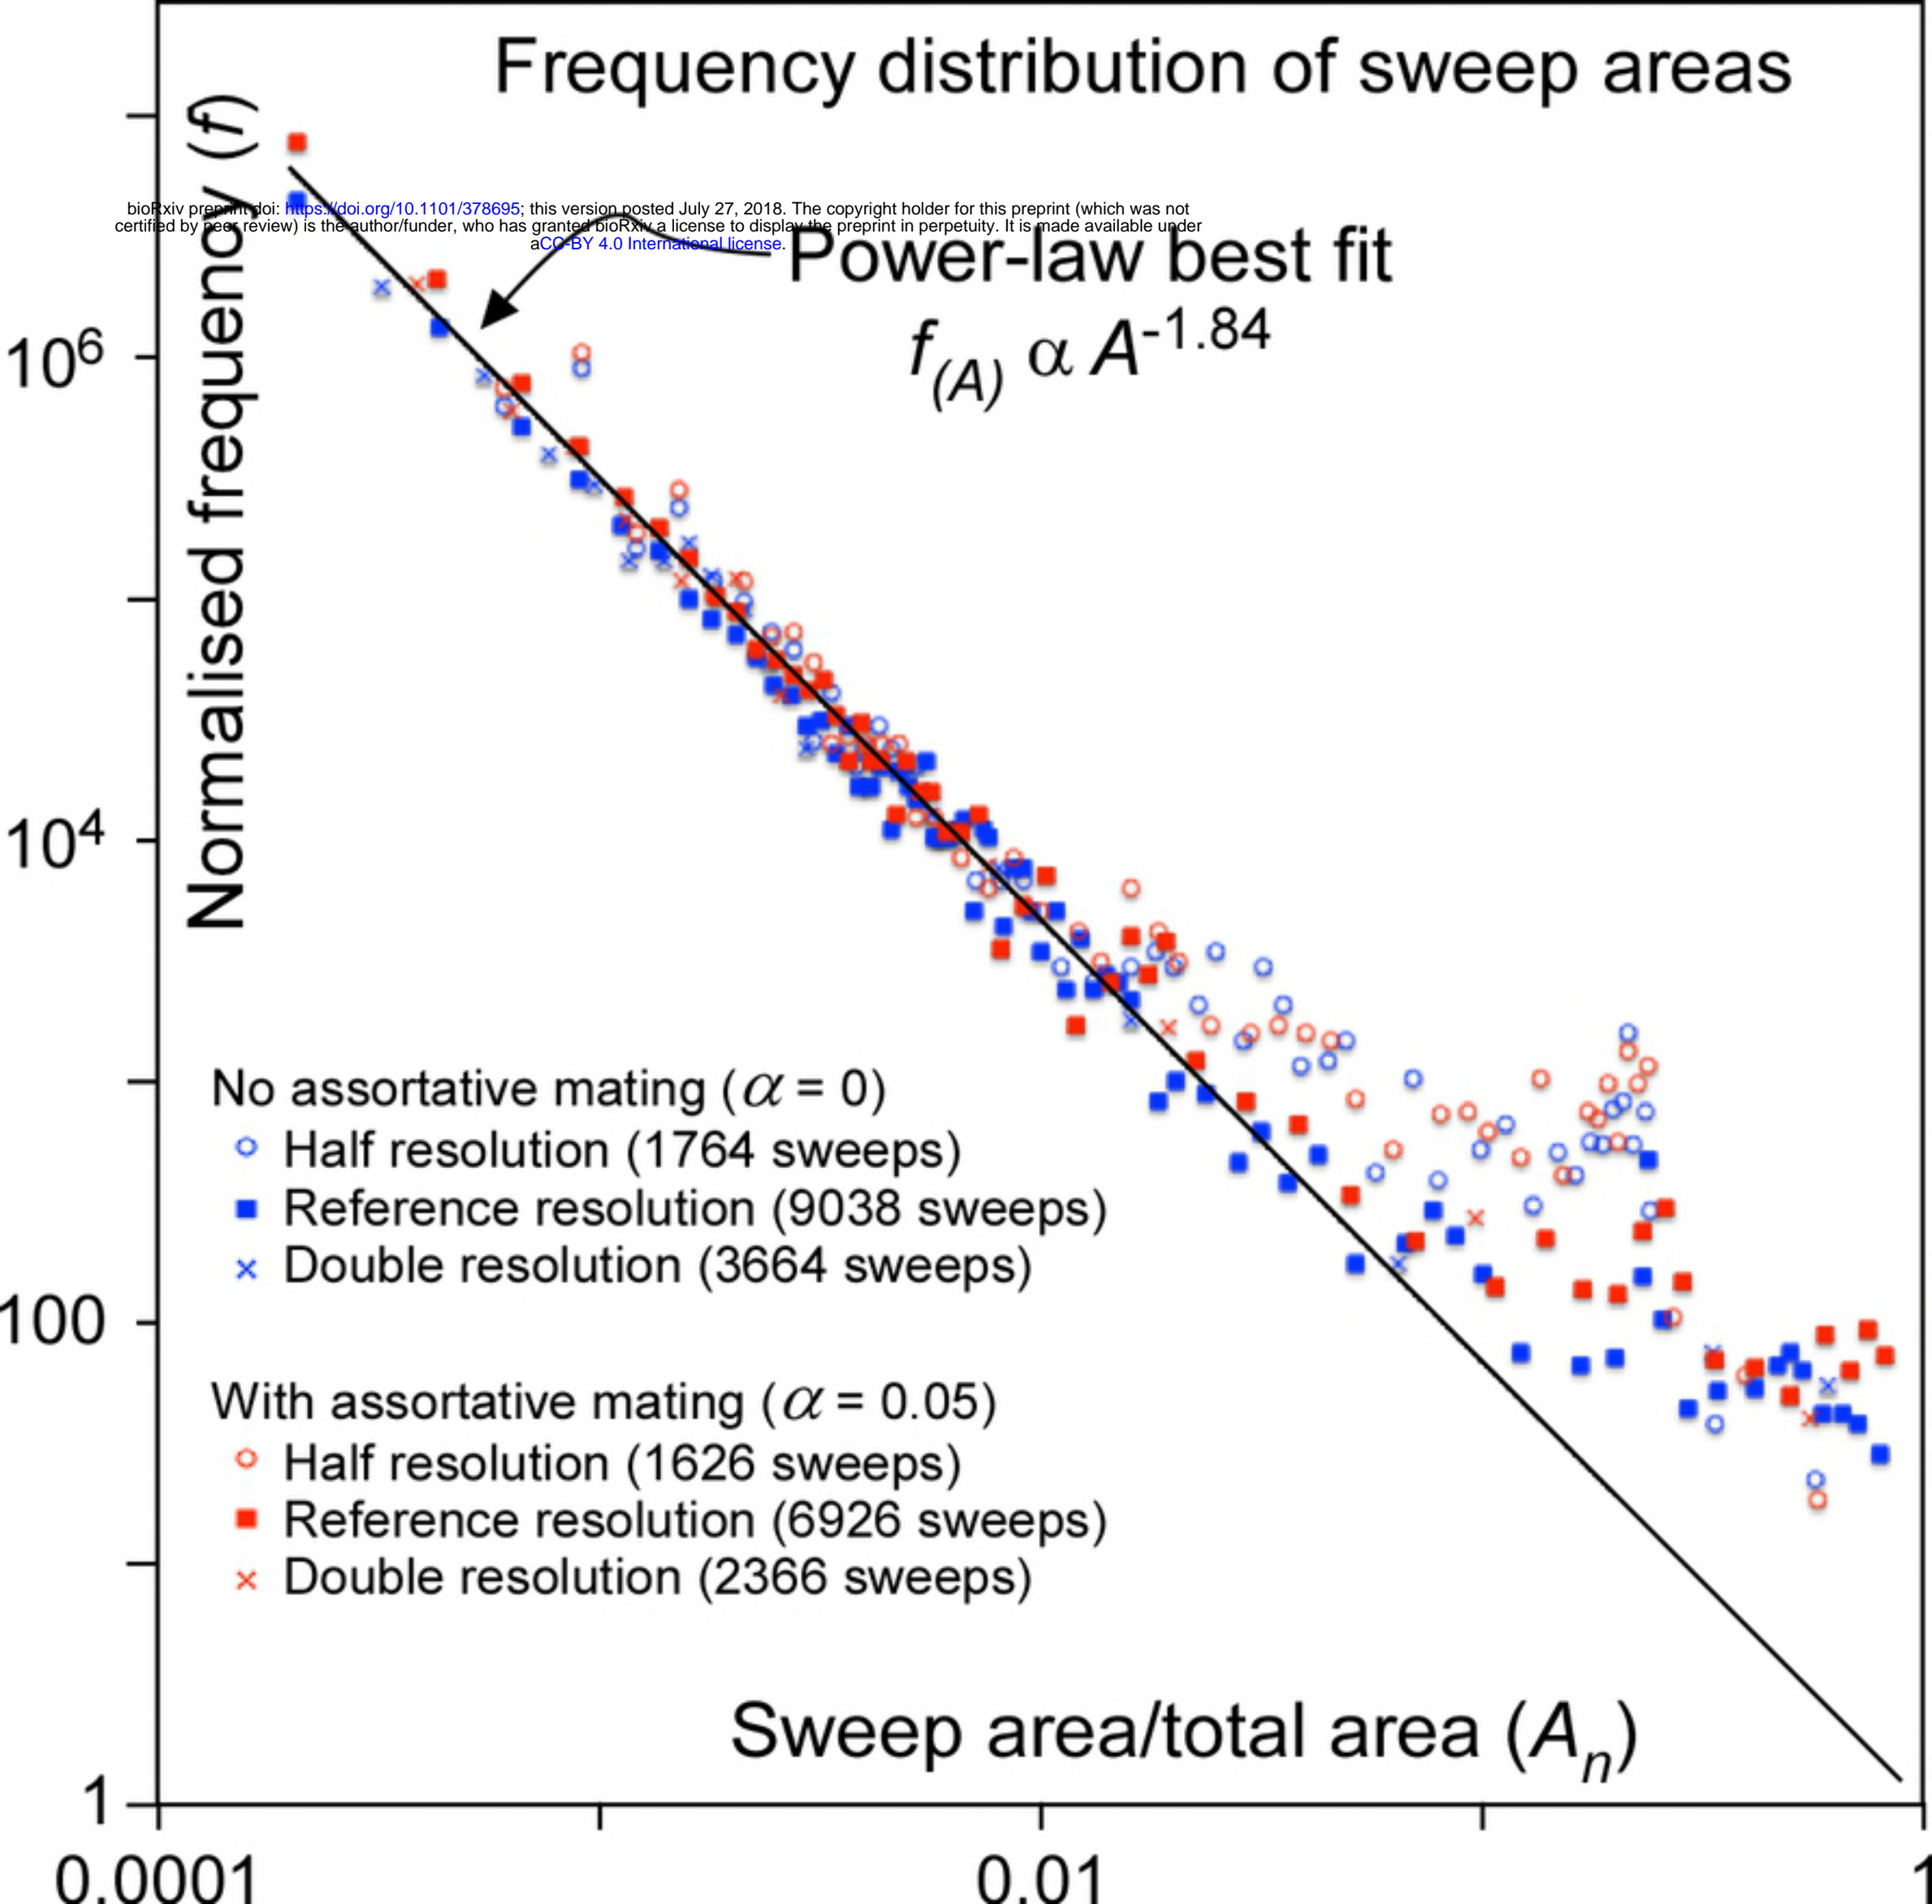

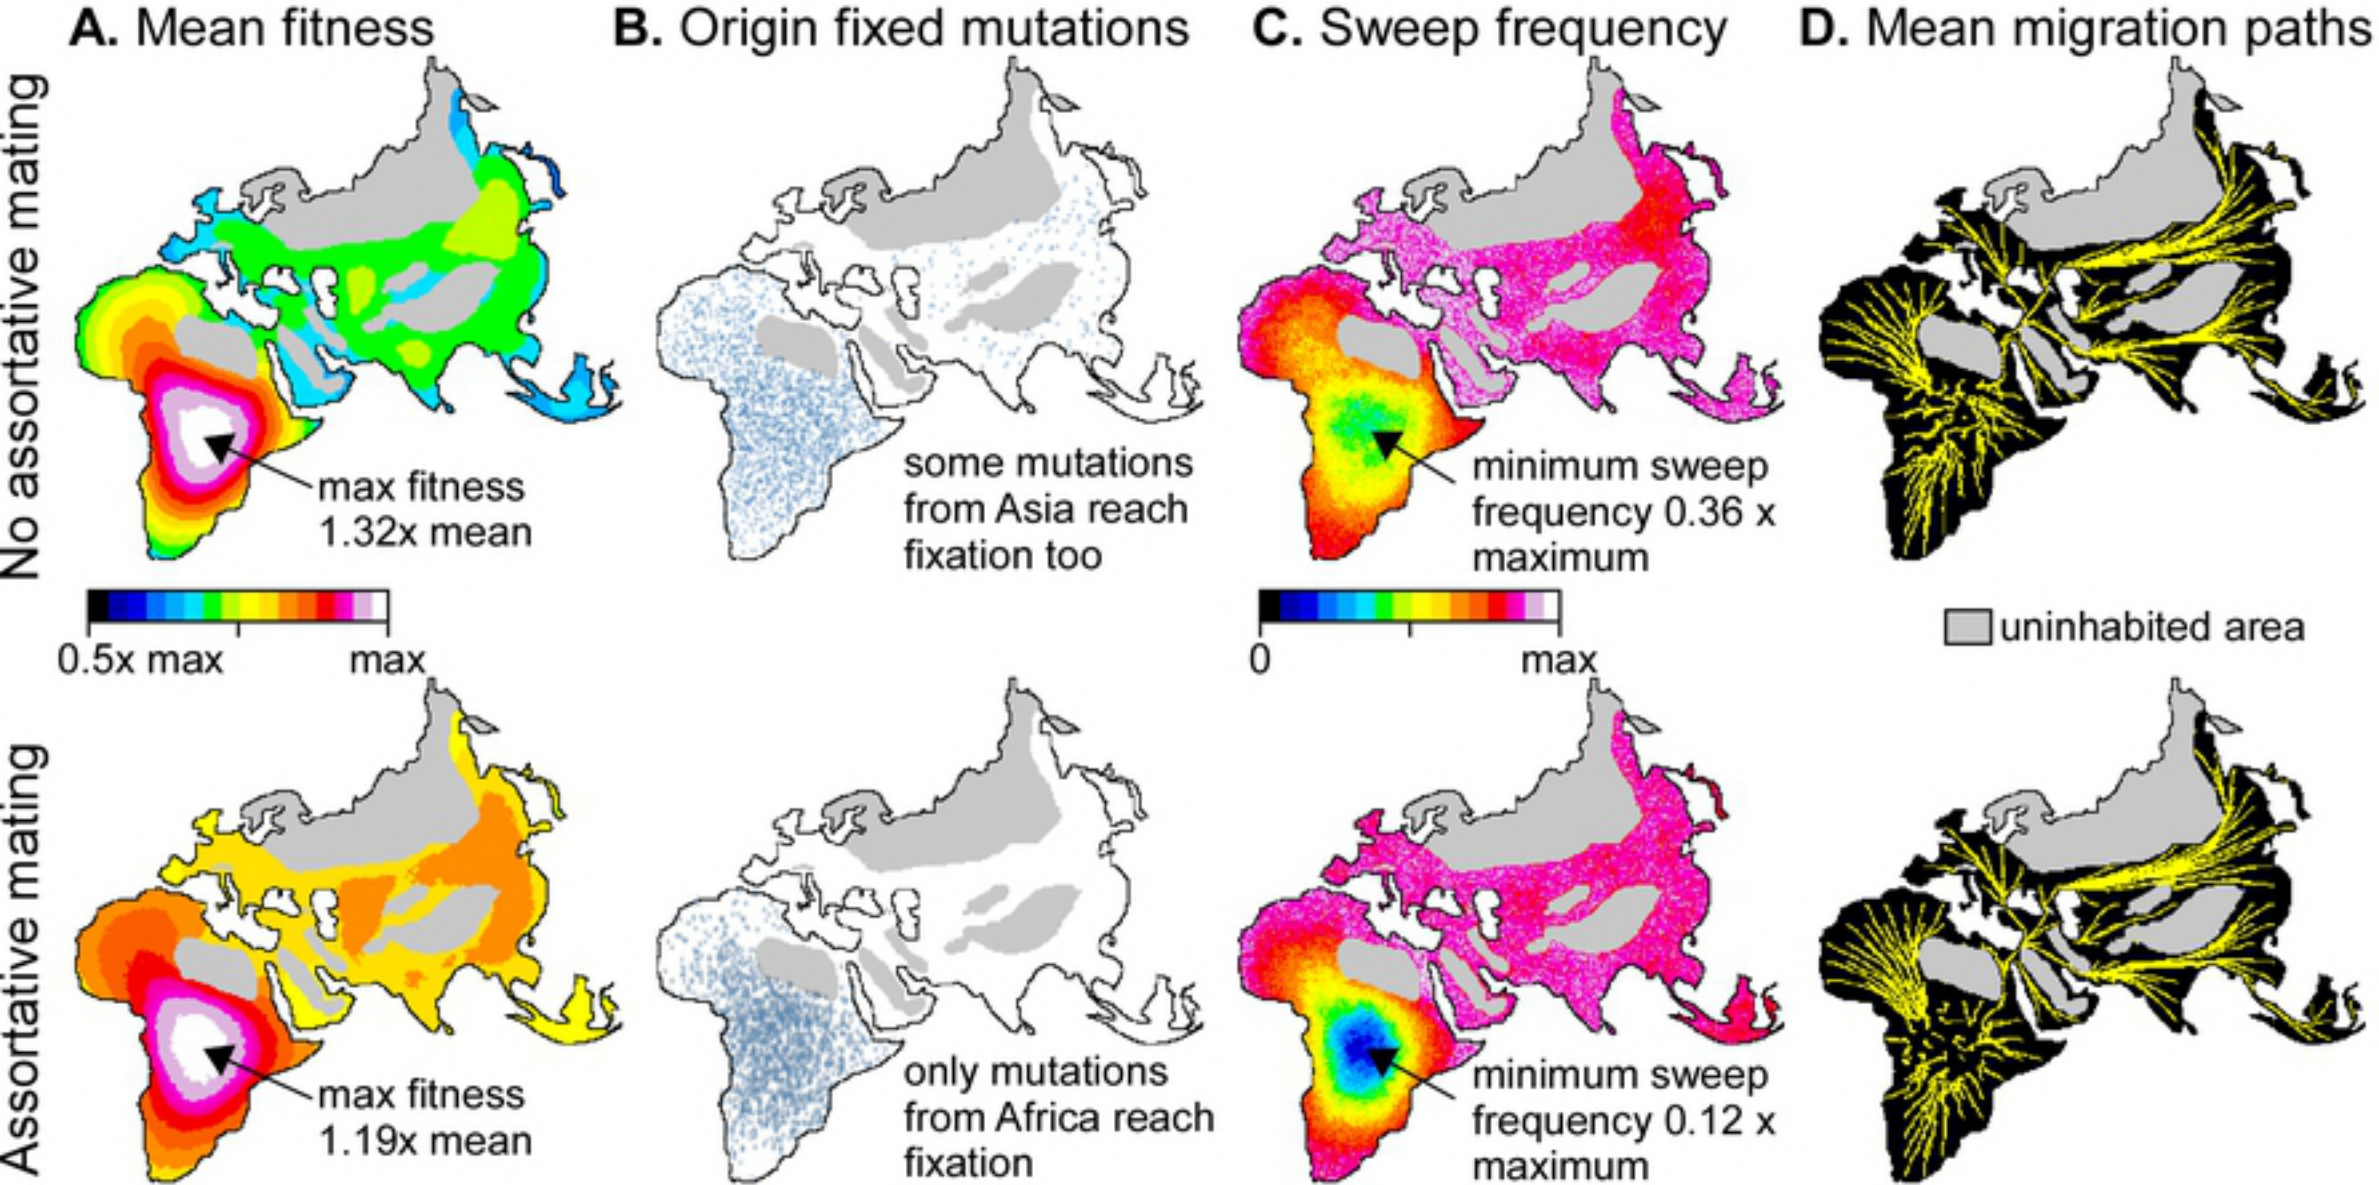

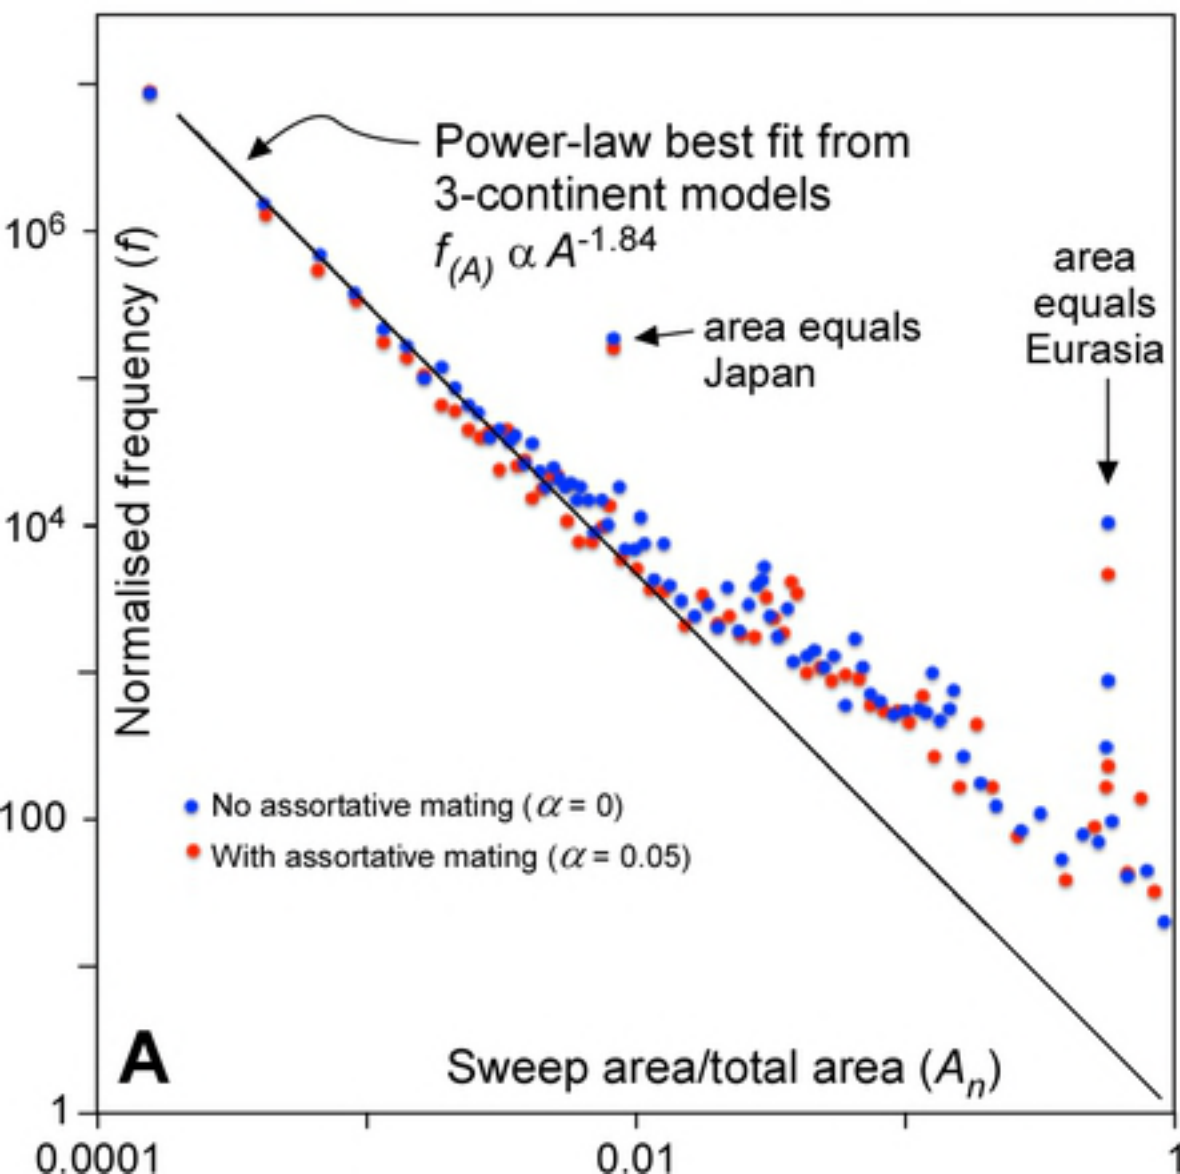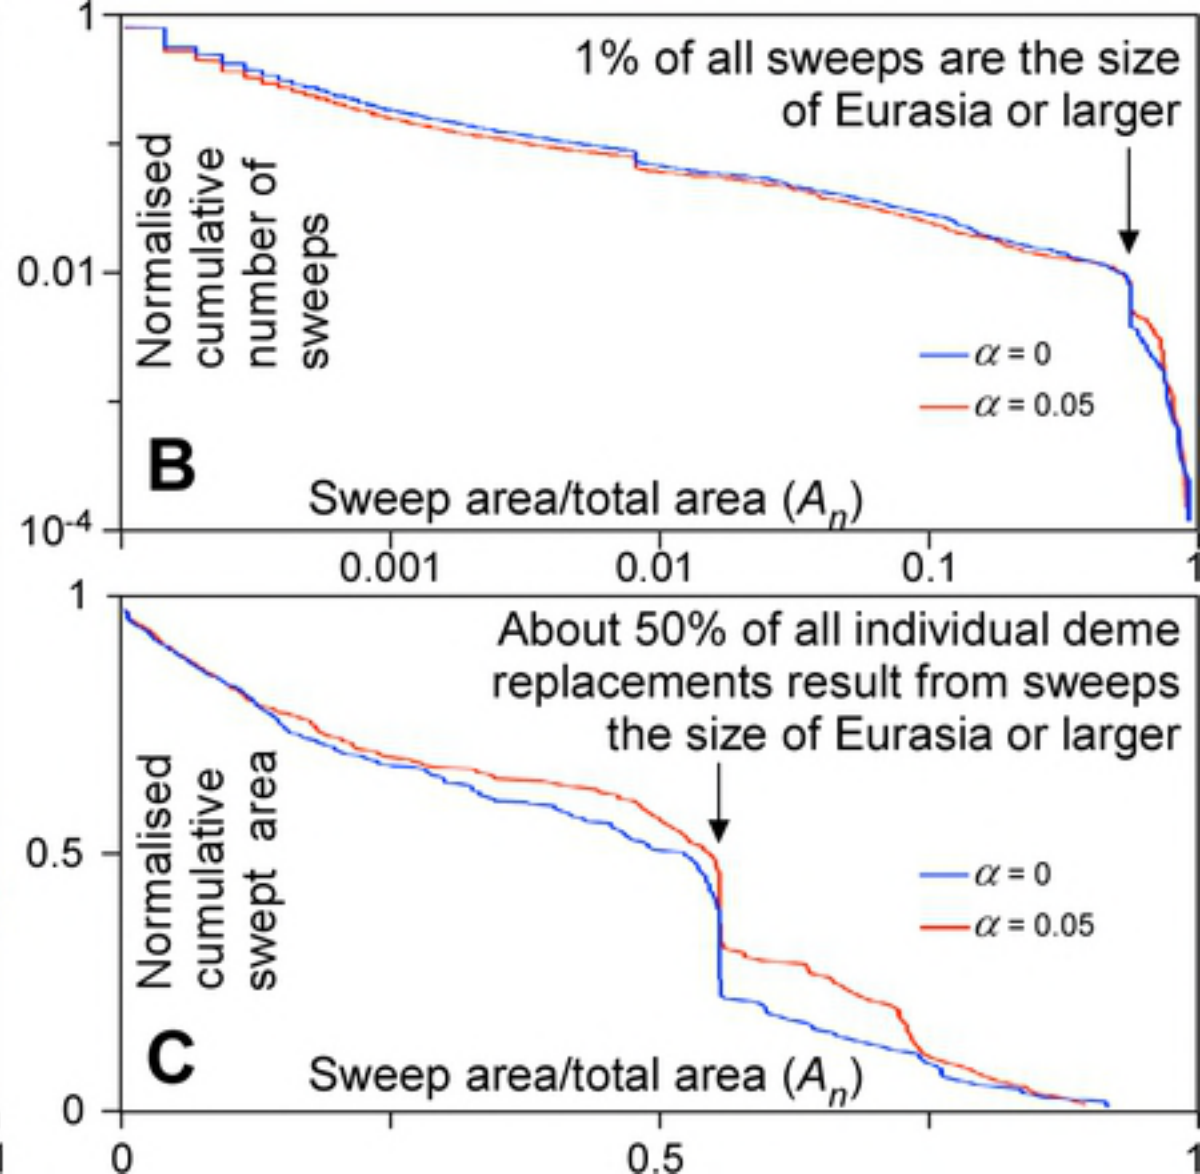

Source: https://biorxiv.org/content/biorxiv/early/2018/07/27/378695.full-text.pdf
